# Supplementary material
Source: PubMed Central journal article supplement (PMC7093837)
Supplement: ci9b00946_si_001.pdf [file ci9b00946_si_001.pdf]

# **Halogen Bonds in Ligand-Protein Systems: Molecular Orbital Theory for Drug Design.**

*Enrico Margiotta,<sup>1,2</sup> Stephanie C. C. van der Lubbe,<sup>1</sup> Lucas de Azevedo Santos,<sup>1,3</sup> Gabor Paragi,<sup>1,4</sup> Stefano Moro,<sup>2</sup> F. Matthias Bickelhaupt<sup>1,5</sup> and Célia Fonseca Guerra\*<sup>1,6</sup>.*

<sup>1</sup>Department of Theoretical Chemistry and Amsterdam Center for Multiscale Modeling, Vrije Universiteit Amsterdam, 1081 HV Amsterdam, The Netherlands

<sup>2</sup>Molecular Modeling Section (MMS), Dipartimento di Scienze del Farmaco, Università di Padova, via Marzolo 5, 35131 Padova, Italy

<sup>3</sup>Department of Chemistry, Federal University of Lavras, CEP 37200-000 Lavras, Minas Gerais, Brazil

<sup>4</sup>Supramolecular and Nanostructured Materials Research Group of the Hungarian Academy of Sciences at the University of Szeged Dom ter 8, Szeged, Hungary

<sup>5</sup>Institute of Molecules and Materials, Radboud University, Heyendaalseweg 135, NL-6525 AJ Nijmegen, The Netherlands.

<sup>6</sup>Leiden Institute of Chemistry, Leiden University, PO Box 9502, NL-2300 RA Leiden, The Netherlands.

## **Corresponding Author**

\*Email: [c.fonsecaguerra@vu.nl](mailto:c.fonsecaguerra@vu.nl)

|             |                                                            |    |
|-------------|------------------------------------------------------------|----|
| <b>SI 1</b> | Cartesian coordinates of optimized monomers                | 2  |
| <b>SI 2</b> | Cartesian coordinates of optimized complexes               | 8  |
| <b>SI 3</b> | Basis superposition errors (BSSEs) for optimized complexes | 21 |
| <b>SI 4</b> | Energy Decomposition Analysis of XB complexes              | 22 |
| <b>SI 5</b> | Intramolecular and intermolecular hydrogen bonds           | 23 |
| <b>SI 6</b> | Cartesian coordinates of constrained complexes             | 24 |
| <b>SI 7</b> | Cartesian Coordinates of constrained angle complexes       | 55 |

## SI 1| Cartesian coordinates of optimized monomers

Cartesian coordinates (Å) and total bonding energies (kcal mol<sup>-1</sup>) of all the optimized monomers used in this work, computed at BLYP-D3(BJ)/TZ2P level of theory. All minima have been verified by frequency analysis and have only positive frequencies.

### Bromobenzene (PhBr)

-1630.83 kcal mol<sup>-1</sup>

|       |           |           |           |
|-------|-----------|-----------|-----------|
| 1.C   | -1.644834 | 12.973234 | -0.207388 |
| 2.C   | -2.229974 | 13.808331 | 0.745763  |
| 3.C   | -1.862348 | 15.158728 | 0.774854  |
| 4.C   | -0.925588 | 15.658887 | -0.135937 |
| 5.C   | -0.351309 | 14.803440 | -1.082289 |
| 6.C   | -0.707741 | 13.450426 | -1.125210 |
| 7.H   | -2.956399 | 13.414161 | 1.449774  |
| 8.H   | -2.313421 | 15.816981 | 1.514052  |
| 9.H   | -0.644780 | 16.708812 | -0.108317 |
| 10.H  | 0.378032  | 15.184128 | -1.793842 |
| 11.H  | -0.265777 | 12.781522 | -1.857273 |
| 12.Br | -2.147126 | 11.103576 | -0.258742 |

### 1

-494.37 kcal mol<sup>-1</sup>

|     |           |          |          |
|-----|-----------|----------|----------|
| 1.O | -2.938983 | 2.338927 | 0.000000 |
| 2.C | -3.047249 | 1.131940 | 0.000000 |
| 3.H | -2.158661 | 0.459103 | 0.000000 |
| 4.H | -4.041387 | 0.627970 | 0.000000 |

### 2

-869.65 kcal mol<sup>-1</sup>

|     |           |          |          |
|-----|-----------|----------|----------|
| 1.O | -3.417619 | 8.079859 | 0.399669 |
| 2.C | -2.582484 | 7.797901 | 1.237590 |
| 3.H | -1.787102 | 8.535527 | 1.511808 |
| 4.C | -2.512562 | 6.484084 | 1.980192 |

|     |           |          |          |
|-----|-----------|----------|----------|
| 5.H | -1.532075 | 6.018608 | 1.803769 |
| 6.H | -3.314192 | 5.810768 | 1.664713 |
| 7.H | -2.577862 | 6.674126 | 3.061305 |

### 3

-1242.55 kcal mol<sup>-1</sup>

|      |           |          |          |
|------|-----------|----------|----------|
| 1.O  | -3.232260 | 8.027787 | 0.253322 |
| 2.C  | -2.497296 | 7.826131 | 1.208291 |
| 3.C  | -1.494257 | 8.870356 | 1.686844 |
| 4.C  | -2.531687 | 6.516234 | 1.988260 |
| 5.H  | -1.572516 | 5.992906 | 1.872330 |
| 6.H  | -3.341310 | 5.880991 | 1.621774 |
| 7.H  | -2.659670 | 6.709675 | 3.061436 |
| 8.H  | -0.487952 | 8.436295 | 1.753510 |
| 9.H  | -1.763602 | 9.203949 | 2.698495 |
| 10.H | -1.489891 | 9.726670 | 1.008585 |

### 4

-783.11 kcal mol<sup>-1</sup>

|     |           |          |          |
|-----|-----------|----------|----------|
| 1.O | -3.200747 | 8.012303 | 0.185688 |
| 2.C | -2.617436 | 7.829342 | 1.244491 |
| 3.H | -1.909849 | 8.568066 | 1.681315 |
| 4.N | -2.747147 | 6.715324 | 2.027799 |
| 5.H | -3.366616 | 5.967058 | 1.734956 |
| 6.H | -2.235880 | 6.622348 | 2.896376 |

### 5

-1143.79 kcal mol<sup>-1</sup>

|     |           |          |          |
|-----|-----------|----------|----------|
| 1.O | -3.452186 | 8.122509 | 0.349198 |
| 2.C | -2.774724 | 7.923936 | 1.350911 |
| 3.H | -2.260657 | 8.741274 | 1.904765 |
| 4.N | -2.555277 | 6.701370 | 1.922244 |
| 5.H | -2.999096 | 5.910368 | 1.462667 |
| 6.C | -1.748038 | 6.469254 | 3.116559 |
| 7.H | -0.897152 | 5.810208 | 2.902733 |
| 8.H | -2.345391 | 6.025689 | 3.923115 |

|     |           |          |          |
|-----|-----------|----------|----------|
| 9.H | -1.357933 | 7.430086 | 3.467467 |
|-----|-----------|----------|----------|

### 5'

-1154.29 kcal mol<sup>-1</sup>

|     |           |          |          |
|-----|-----------|----------|----------|
| 1.O | -3.655404 | 8.258692 | 0.661205 |
| 2.C | -2.743250 | 7.948833 | 1.423245 |
| 3.C | -1.729666 | 8.968800 | 1.940467 |
| 4.N | -2.568991 | 6.659110 | 1.868582 |
| 5.H | -3.221278 | 5.948934 | 1.556701 |
| 6.H | -1.823294 | 6.397394 | 2.498460 |
| 7.H | -0.958664 | 8.536771 | 2.587199 |
| 8.H | -2.270343 | 9.744012 | 2.493955 |
| 9.H | -1.252082 | 9.449322 | 1.080355 |

### 6

-1513.90 kcal mol<sup>-1</sup>

|      |           |          |          |
|------|-----------|----------|----------|
| 1.O  | -3.286655 | 8.149615 | 0.351742 |
| 2.C  | -2.583707 | 7.957459 | 1.345590 |
| 3.C  | -1.545718 | 8.968004 | 1.827589 |
| 4.N  | -2.702973 | 6.808989 | 2.095209 |
| 5.H  | -3.375365 | 6.142477 | 1.729029 |
| 6.C  | -1.885754 | 6.421000 | 3.244422 |
| 7.H  | -0.839669 | 6.229082 | 2.966684 |
| 8.H  | -2.299138 | 5.503068 | 3.670250 |
| 9.H  | -1.901477 | 7.191328 | 4.024601 |
| 10.H | -0.542893 | 8.523737 | 1.857850 |
| 11.H | -1.780461 | 9.320331 | 2.839968 |
| 12.H | -1.548244 | 9.814924 | 1.140127 |

### 6'

-1520.15 kcal mol<sup>-1</sup>

|     |           |          |          |
|-----|-----------|----------|----------|
| 1.O | -3.306048 | 8.416815 | 0.716093 |
| 2.C | -2.671539 | 7.765240 | 1.542368 |
| 3.C | -1.728199 | 8.409651 | 2.568299 |
| 4.N | -2.739666 | 6.392494 | 1.594152 |
| 5.H | -3.296271 | 5.908444 | 0.899247 |

|      |           |           |          |
|------|-----------|-----------|----------|
| 6.H  | -2.209741 | 5.849816  | 2.262523 |
| 7.H  | -1.588598 | 7.741958  | 3.429100 |
| 8.C  | -2.213901 | 9.794267  | 3.020749 |
| 9.H  | -0.747829 | 8.498530  | 2.077139 |
| 10.H | -1.473336 | 10.266760 | 3.675384 |
| 11.H | -3.159570 | 9.717007  | 3.569527 |
| 12.H | -2.382631 | 10.438126 | 2.152877 |

## 7

-1847.91 kcal mol<sup>-1</sup>

|      |           |          |          |
|------|-----------|----------|----------|
| 1.O  | -2.801208 | 8.530670 | 0.791521 |
| 2.C  | -2.371930 | 7.846538 | 1.717728 |
| 3.C  | -0.882885 | 7.685819 | 2.009321 |
| 4.N  | -3.239331 | 7.184475 | 2.570527 |
| 5.H  | -4.220652 | 7.310540 | 2.342212 |
| 6.C  | -2.875565 | 6.304220 | 3.671016 |
| 7.H  | -2.134790 | 6.758498 | 4.340097 |
| 8.C  | -2.348470 | 4.933011 | 3.220246 |
| 9.H  | -3.774099 | 6.117097 | 4.274704 |
| 10.H | -0.569356 | 6.636642 | 1.945104 |
| 11.H | -0.637138 | 8.040022 | 3.018247 |
| 12.H | -0.328981 | 8.271572 | 1.274673 |
| 13.O | -1.612685 | 4.241564 | 3.891539 |
| 14.H | -2.701646 | 4.614191 | 2.208521 |

## 8

-2135.54 kcal mol<sup>-1</sup>

|      |           |          |          |
|------|-----------|----------|----------|
| 1.O  | -3.406540 | 8.329306 | 0.604244 |
| 2.C  | -2.753331 | 7.841351 | 1.525423 |
| 3.C  | -1.235823 | 7.957025 | 1.617089 |
| 4.N  | -3.380859 | 7.143478 | 2.544268 |
| 5.H  | -4.394845 | 7.141469 | 2.478540 |
| 6.C  | -2.752098 | 6.507657 | 3.696558 |
| 7.H  | -1.921234 | 7.110244 | 4.076392 |
| 8.C  | -2.196287 | 5.076830 | 3.487401 |
| 9.H  | -3.485110 | 6.441871 | 4.507737 |
| 10.H | -0.759158 | 6.976738 | 1.732212 |

|      |           |          |          |
|------|-----------|----------|----------|
| 11.H | -0.947172 | 8.569675 | 2.480567 |
| 12.H | -0.876715 | 8.435211 | 0.704804 |
| 13.O | -1.544965 | 4.532304 | 4.373970 |
| 14.N | -2.491848 | 4.495871 | 2.287628 |
| 15.H | -3.028481 | 4.987054 | 1.584138 |
| 16.H | -2.161480 | 3.556036 | 2.105198 |

## 9

-2497.68 kcal mol<sup>-1</sup>

|      |           |          |          |
|------|-----------|----------|----------|
| 1.O  | -3.277247 | 8.156124 | 0.321490 |
| 2.C  | -2.672032 | 7.762954 | 1.317998 |
| 3.C  | -1.156775 | 7.860101 | 1.458052 |
| 4.N  | -3.353502 | 7.195286 | 2.381675 |
| 5.H  | -4.364104 | 7.208340 | 2.276804 |
| 6.C  | -2.784301 | 6.695548 | 3.629699 |
| 7.H  | -1.959610 | 7.330633 | 3.967984 |
| 8.C  | -2.244471 | 5.243476 | 3.620977 |
| 9.H  | -3.552013 | 6.740509 | 4.409452 |
| 10.H | -0.708933 | 6.894193 | 1.718238 |
| 11.H | -0.888685 | 8.573079 | 2.248052 |
| 12.H | -0.750334 | 8.211434 | 0.508698 |
| 13.O | -1.648246 | 4.809592 | 4.607115 |
| 14.N | -2.488491 | 4.531677 | 2.484085 |
| 15.H | -2.989558 | 5.001693 | 1.737948 |
| 16.C | 2.059142  | 3.146390 | 2.303205 |
| 17.H | -1.375621 | 3.058260 | 1.450175 |
| 18.H | -2.921291 | 2.489260 | 2.137936 |
| 19.H | -1.541015 | 2.838156 | 3.214118 |

## HOH

-317.9 kcal mol<sup>-1</sup>

|     |          |           |          |
|-----|----------|-----------|----------|
| 1.O | 3.317721 | 0.110963  | 0.000000 |
| 2.H | 2.346557 | 0.058733  | 0.000000 |
| 3.H | 3.610511 | -0.816464 | 0.000000 |

## NC<sub>5</sub>H<sub>5</sub>

-1573.88 kcal mol<sup>-1</sup>

|      |           |           |           |
|------|-----------|-----------|-----------|
| 1.C  | -0.000000 | 0.175426  | -2.258196 |
| 2.C  | 0.000000  | -1.041899 | -0.184253 |
| 3.C  | -0.000000 | -1.048323 | -1.583687 |
| 4.H  | -0.000000 | 2.328407  | -1.982966 |
| 5.H  | 0.000000  | 2.152609  | 0.507691  |
| 6.C  | 0.000000  | 1.252725  | -0.108190 |
| 7.H  | 0.000000  | -1.980670 | 0.370587  |
| 8.C  | -0.000000 | 1.351832  | -1.504121 |
| 9.H  | -0.000000 | -1.991088 | -2.126153 |
| 10.H | -0.000000 | 0.211506  | -3.345290 |
| 11.N | 0.000000  | 0.082142  | 0.555338  |

## SI 2 | Cartesian coordinates of optimized complexes

Cartesian coordinates (Å) and total bonding energies (kcal mol<sup>-1</sup>) of all the optimized complexes, computed at BLYP-D3(BJ)/TZ2P level of theory. Single-point energy calculated using QZ4P basis set is reported.

**1**

-2127.29 kcal mol<sup>-1</sup>

-2132.16 kcal mol<sup>-1</sup> (QZ4P)

|       |           |           |           |
|-------|-----------|-----------|-----------|
| 1.C   | -1.849889 | 12.908509 | -0.147206 |
| 2.C   | -2.386471 | 13.848941 | 0.734908  |
| 3.C   | -1.847083 | 15.140328 | 0.759126  |
| 4.C   | -0.787184 | 15.482289 | -0.087701 |
| 5.C   | -0.263774 | 14.526466 | -0.965139 |
| 6.C   | -0.792593 | 13.230959 | -1.000806 |
| 7.H   | -3.210210 | 13.578735 | 1.388790  |
| 8.H   | -2.261042 | 15.877713 | 1.443429  |
| 9.H   | -0.372697 | 16.487139 | -0.064826 |
| 10.H  | 0.559307  | 14.784257 | -1.628063 |
| 11.H  | -0.391175 | 12.485726 | -1.680965 |
| 12.Br | -2.587214 | 11.119174 | -0.187468 |
| 13.O  | -3.308612 | 8.079435  | 0.313624  |
| 14.C  | -2.567011 | 7.858742  | 1.247753  |
| 15.H  | -1.898642 | 8.645529  | 1.663061  |
| 16.H  | -2.519504 | 6.858090  | 1.734230  |

**2**

-2502.76 kcal mol<sup>-1</sup>

-2508.53 kcal mol<sup>-1</sup> (QZ4P)



|       |           |           |           |
|-------|-----------|-----------|-----------|
| 1.C   | -1.867830 | 12.909646 | -0.086207 |
| 2.C   | -2.397764 | 13.892020 | 0.753708  |
| 3.C   | -1.847934 | 15.178873 | 0.724985  |
| 4.C   | -0.783252 | 15.476312 | -0.132683 |
| 5.C   | -0.266024 | 14.479739 | -0.967496 |
| 6.C   | -0.805724 | 13.188395 | -0.949655 |
| 7.H   | -3.225098 | 13.656465 | 1.416482  |
| 8.H   | -2.257271 | 15.947874 | 1.376558  |
| 9.H   | -0.360378 | 16.477786 | -0.151120 |
| 10.H  | 0.560712  | 14.702529 | -1.638569 |
| 11.H  | -0.408869 | 12.411943 | -1.596836 |
| 12.Br | -2.619713 | 11.126674 | -0.051347 |
| 13.O  | -3.401463 | 8.153668  | 0.442359  |
| 14.C  | -2.578747 | 7.830689  | 1.279913  |
| 15.H  | -1.818182 | 8.569671  | 1.629620  |
| 16.C  | -2.490950 | 6.464622  | 1.914698  |
| 17.H  | -1.493406 | 6.041448  | 1.727722  |
| 18.H  | -3.264949 | 5.797645  | 1.525528  |
| 19.H  | -2.587077 | 6.565112  | 3.005466  |

**3**

-2875.86 kcal mol<sup>-1</sup>

-2882.54 kcal mol<sup>-1</sup> (QZ4P)

|     |           |           |           |
|-----|-----------|-----------|-----------|
| 1.C | -1.730514 | 13.170704 | -0.123550 |
| 2.C | -2.345879 | 14.150982 | 0.659069  |
| 3.C | -1.972624 | 15.489407 | 0.490773  |
| 4.C | -0.996828 | 15.840862 | -0.448390 |
| 5.C | -0.391570 | 14.846251 | -1.224368 |

|       |           |           |           |
|-------|-----------|-----------|-----------|
| 6.C   | -0.755100 | 13.503836 | -1.066733 |
| 7.H   | -3.103638 | 13.873487 | 1.385789  |
| 8.H   | -2.449533 | 16.256173 | 1.097565  |
| 9.H   | -0.710766 | 16.882163 | -0.575137 |
| 10.H  | 0.367153  | 15.110434 | -1.957904 |
| 11.H  | -0.289028 | 12.728621 | -1.667696 |
| 12.Br | -2.236062 | 11.316631 | 0.106936  |
| 13.O  | -2.967937 | 8.361851  | 0.625794  |
| 14.C  | -2.380581 | 7.700296  | 1.470744  |
| 15.C  | -1.185132 | 8.246680  | 2.239465  |
| 16.C  | -2.811747 | 6.278704  | 1.809850  |
| 17.H  | -2.011468 | 5.576361  | 1.538859  |
| 18.H  | -3.724131 | 6.021488  | 1.267018  |
| 19.H  | -2.972948 | 6.173869  | 2.890813  |
| 20.H  | -0.335926 | 7.554558  | 2.168051  |
| 21.H  | -1.441018 | 8.325311  | 3.305140  |
| 22.H  | -0.904312 | 9.230582  | 1.858578  |

4

-2416.41 kcal mol<sup>-1</sup>

-2422.21 kcal mol<sup>-1</sup> (QZ4P)

|     |           |           |           |
|-----|-----------|-----------|-----------|
| 1.C | -1.849612 | 12.892958 | -0.111067 |
| 2.C | -2.424942 | 13.874395 | 0.700015  |
| 3.C | -1.886198 | 15.166173 | 0.690992  |
| 4.C | -0.786855 | 15.470530 | -0.119262 |
| 5.C | -0.223785 | 14.475581 | -0.925952 |
| 6.C | -0.752188 | 13.179504 | -0.926945 |
| 7.H | -3.279318 | 13.633774 | 1.325726  |
| 8.H | -2.331493 | 15.933827 | 1.320277  |

|       |           |           |           |
|-------|-----------|-----------|-----------|
| 9.H   | -0.372763 | 16.475856 | -0.122857 |
| 10.H  | 0.630139  | 14.703556 | -1.560305 |
| 11.H  | -0.319703 | 12.404348 | -1.552607 |
| 12.Br | -2.585634 | 11.103498 | -0.103670 |
| 13.O  | -3.405271 | 8.169769  | 0.350159  |
| 14.C  | -2.697904 | 7.902973  | 1.313842  |
| 15.H  | -2.006624 | 8.641238  | 1.771869  |
| 16.N  | -2.663709 | 6.690751  | 1.941294  |
| 17.H  | -3.255033 | 5.936547  | 1.608206  |
| 18.H  | -2.056808 | 6.529403  | 2.734988  |

## 5

-2777.22 kcal mol<sup>-1</sup>

-2783.82 kcal mol<sup>-1</sup> (QZ4P)

|       |           |           |           |
|-------|-----------|-----------|-----------|
| 1.C   | -1.852055 | 12.908197 | -0.107045 |
| 2.C   | -2.461898 | 13.893343 | 0.674020  |
| 3.C   | -1.944877 | 15.193888 | 0.655628  |
| 4.C   | -0.832541 | 15.503899 | -0.134539 |
| 5.C   | -0.234710 | 14.505604 | -0.911593 |
| 6.C   | -0.741272 | 13.200881 | -0.902672 |
| 7.H   | -3.326261 | 13.648511 | 1.284241  |
| 8.H   | -2.417288 | 15.964023 | 1.261724  |
| 9.H   | -0.435327 | 16.515981 | -0.145568 |
| 10.H  | 0.629510  | 14.737788 | -1.530334 |
| 11.H  | -0.281671 | 12.423170 | -1.505475 |
| 12.Br | -2.556329 | 11.106115 | -0.085688 |
| 13.O  | -3.328520 | 8.179865  | 0.356924  |
| 14.C  | -2.640451 | 7.920503  | 1.340450  |
| 15.H  | -1.985144 | 8.674348  | 1.826837  |

|      |           |          |          |
|------|-----------|----------|----------|
| 16.N | -2.585612 | 6.704649 | 1.956376 |
| 17.H | -3.165755 | 5.973522 | 1.552777 |
| 18.C | -1.767238 | 6.399048 | 3.126889 |
| 19.H | -1.036994 | 5.609825 | 2.908439 |
| 20.H | -2.387211 | 6.083424 | 3.975297 |
| 21.H | -1.221164 | 7.302110 | 3.417314 |

5'

-2787.92 kcal mol<sup>-1</sup>

-2794.58 kcal mol<sup>-1</sup> (QZ4P)

|       |           |           |           |
|-------|-----------|-----------|-----------|
| 1.C   | -1.739839 | 13.111750 | -0.110818 |
| 2.C   | -2.337159 | 14.094994 | 0.682619  |
| 3.C   | -1.939124 | 15.428274 | 0.531328  |
| 4.C   | -0.955881 | 15.773248 | -0.402532 |
| 5.C   | -0.368381 | 14.776798 | -1.189828 |
| 6.C   | -0.757058 | 13.439674 | -1.048679 |
| 7.H   | -3.101468 | 13.823163 | 1.404746  |
| 8.H   | -2.402643 | 16.196387 | 1.146834  |
| 9.H   | -0.650591 | 16.810581 | -0.516544 |
| 10.H  | 0.395919  | 15.035714 | -1.919526 |
| 11.H  | -0.304931 | 12.663314 | -1.658882 |
| 12.Br | -2.281523 | 11.265279 | 0.093037  |
| 13.O  | -3.059548 | 8.359732  | 0.515556  |
| 14.C  | -2.555066 | 7.765366  | 1.467958  |
| 15.C  | -1.565349 | 8.431467  | 2.418490  |
| 16.N  | -2.855078 | 6.453295  | 1.740758  |
| 17.H  | -3.510578 | 5.971809  | 1.136010  |
| 18.H  | -2.446137 | 5.953944  | 2.518385  |
| 19.H  | -1.188030 | 7.761157  | 3.197589  |

|      |           |          |          |
|------|-----------|----------|----------|
| 20.H | -2.056744 | 9.291100 | 2.885715 |
| 21.H | -0.726112 | 8.818820 | 1.832297 |

## 6

-3147.53 kcal mol<sup>-1</sup>

-3155.00 kcal mol<sup>-1</sup> (QZ4P)

|       |           |           |           |
|-------|-----------|-----------|-----------|
| 1.C   | -1.759393 | 13.245236 | -0.161213 |
| 2.C   | -2.454788 | 14.249723 | 0.517468  |
| 3.C   | -2.108885 | 15.587783 | 0.296287  |
| 4.C   | -1.079840 | 15.916666 | -0.592968 |
| 5.C   | -0.394001 | 14.899155 | -1.265412 |
| 6.C   | -0.729930 | 13.557028 | -1.053513 |
| 7.H   | -3.253696 | 13.989977 | 1.205805  |
| 8.H   | -2.648710 | 16.372211 | 0.822565  |
| 9.H   | -0.815146 | 16.957764 | -0.761377 |
| 10.H  | 0.406581  | 15.145355 | -1.959822 |
| 11.H  | -0.201192 | 12.764241 | -1.574517 |
| 12.Br | -2.227262 | 11.392560 | 0.143172  |
| 13.O  | -2.887759 | 8.501883  | 0.765091  |
| 14.C  | -2.324932 | 7.911050  | 1.692031  |
| 15.C  | -1.109458 | 8.476808  | 2.417813  |
| 16.N  | -2.775534 | 6.687945  | 2.126980  |
| 17.H  | -3.579619 | 6.334128  | 1.618538  |
| 18.C  | -2.199693 | 5.868445  | 3.192891  |
| 19.H  | -1.172091 | 5.557473  | 2.962177  |
| 20.H  | -2.809675 | 4.968683  | 3.305252  |
| 21.H  | -2.194556 | 6.397652  | 4.154263  |
| 22.H  | -0.249731 | 7.801122  | 2.327106  |
| 23.H  | -1.315978 | 8.604643  | 3.487769  |

24.H -0.861487 9.443883 1.979376

**6'**

-3154.19 kcal mol<sup>-1</sup>

-3161.63 kcal mol<sup>-1</sup> (QZ4P)

|       |           |           |           |
|-------|-----------|-----------|-----------|
| 1.C   | -1.817703 | 13.183216 | -0.122024 |
| 2.C   | -2.284889 | 14.272598 | 0.617888  |
| 3.C   | -1.756222 | 15.543815 | 0.366068  |
| 4.C   | -0.772818 | 15.721741 | -0.613235 |
| 5.C   | -0.316647 | 14.620093 | -1.345412 |
| 6.C   | -0.836724 | 13.343246 | -1.104102 |
| 7.H   | -3.049326 | 14.129885 | 1.375947  |
| 8.H   | -2.118036 | 16.394790 | 0.939263  |
| 9.H   | -0.365863 | 16.711575 | -0.805175 |
| 10.H  | 0.446593  | 14.749220 | -2.109874 |
| 11.H  | -0.487257 | 12.485617 | -1.671374 |
| 12.Br | -2.541139 | 11.422425 | 0.222731  |
| 13.O  | -3.450711 | 8.565657  | 0.847639  |
| 14.C  | -2.613346 | 7.932244  | 1.491489  |
| 15.C  | -1.747729 | 8.577633  | 2.576703  |
| 16.N  | -2.395186 | 6.595029  | 1.270683  |
| 17.H  | -2.926671 | 6.130285  | 0.543355  |
| 18.H  | -1.711894 | 6.065839  | 1.794599  |
| 19.H  | -1.136324 | 7.824427  | 3.090235  |
| 20.C  | -2.596070 | 9.372630  | 3.585712  |
| 21.H  | -1.060641 | 9.260339  | 2.059173  |
| 22.H  | -1.950191 | 9.894925  | 4.299929  |
| 23.H  | -3.264036 | 8.708652  | 4.147221  |
| 24.H  | -3.207180 | 10.112402 | 3.061773  |

7

-3481.39 kcal mol<sup>-1</sup>

-3490.17 kcal mol<sup>-1</sup> (QZ4P)

|       |           |           |           |
|-------|-----------|-----------|-----------|
| 1.C   | -1.748618 | 13.048176 | -0.160449 |
| 2.C   | -2.416800 | 14.041627 | 0.559695  |
| 3.C   | -1.996799 | 15.370966 | 0.435382  |
| 4.C   | -0.922580 | 15.700251 | -0.398439 |
| 5.C   | -0.265207 | 14.692580 | -1.112637 |
| 6.C   | -0.674539 | 13.358981 | -0.998094 |
| 7.H   | -3.251423 | 13.781387 | 1.203910  |
| 8.H   | -2.514847 | 16.148095 | 0.993257  |
| 9.H   | -0.600900 | 16.734633 | -0.491952 |
| 10.H  | 0.570009  | 14.939600 | -1.764498 |
| 11.H  | -0.168821 | 12.573906 | -1.552349 |
| 12.Br | -2.324836 | 11.208258 | 0.004129  |
| 13.O  | -3.238068 | 8.305733  | 0.540718  |
| 14.C  | -2.666545 | 7.839594  | 1.526224  |
| 15.C  | -1.178226 | 8.031694  | 1.791180  |
| 16.N  | -3.371805 | 7.114142  | 2.468592  |
| 17.H  | -4.359485 | 7.009623  | 2.257134  |
| 18.C  | -2.828000 | 6.466655  | 3.653183  |
| 19.H  | -2.190103 | 7.139895  | 4.238250  |
| 20.C  | -2.036122 | 5.184731  | 3.350898  |
| 21.H  | -3.664590 | 6.178482  | 4.304141  |
| 22.H  | -0.653887 | 7.071121  | 1.863565  |
| 23.H  | -1.015065 | 8.568850  | 2.733679  |
| 24.H  | -0.757715 | 8.614585  | 0.971574  |
| 25.O  | -1.181864 | 4.734156  | 4.083759  |

26.H -2.313062 4.688767 2.387982

## 8

-3769.06 kcal mol<sup>-1</sup>

-3778.72 kcal mol<sup>-1</sup> (QZ4P)

|       |           |           |           |
|-------|-----------|-----------|-----------|
| 1.C   | -1.800076 | 12.979156 | -0.131148 |
| 2.C   | -2.460504 | 13.956389 | 0.617527  |
| 3.C   | -2.013319 | 15.281044 | 0.551153  |
| 4.C   | -0.920540 | 15.621241 | -0.253632 |
| 5.C   | -0.271390 | 14.629378 | -0.996852 |
| 6.C   | -0.707572 | 13.300573 | -0.940295 |
| 7.H   | -3.309773 | 13.687808 | 1.238718  |
| 8.H   | -2.524993 | 16.045971 | 1.131289  |
| 9.H   | -0.577985 | 16.651981 | -0.302109 |
| 10.H  | 0.578265  | 14.885062 | -1.626294 |
| 11.H  | -0.208474 | 12.527754 | -1.517267 |
| 12.Br | -2.413654 | 11.145767 | -0.049152 |
| 13.O  | -3.347857 | 8.208678  | 0.374054  |
| 14.C  | -2.701244 | 7.800415  | 1.340218  |
| 15.C  | -1.183995 | 7.899953  | 1.422683  |
| 16.N  | -3.343885 | 7.219145  | 2.417942  |
| 17.H  | -4.357718 | 7.235091  | 2.350601  |
| 18.C  | -2.730338 | 6.690935  | 3.631380  |
| 19.H  | -1.881528 | 7.306790  | 3.943905  |
| 20.C  | -2.217403 | 5.230324  | 3.574293  |
| 21.H  | -3.462314 | 6.733045  | 4.444983  |
| 22.H  | -0.724105 | 6.938649  | 1.677715  |
| 23.H  | -0.892979 | 8.627196  | 2.190841  |
| 24.H  | -0.812415 | 8.244691  | 0.457351  |



|      |           |          |          |
|------|-----------|----------|----------|
| 25.O | -1.588687 | 4.760337 | 4.517934 |
| 26.N | -2.522731 | 4.538889 | 2.437243 |
| 27.H | -3.037321 | 4.971818 | 1.681018 |
| 28.H | -2.217150 | 3.576962 | 2.353495 |

## 9

-4131.22 kcal mol<sup>-1</sup>

-4141.64 kcal mol<sup>-1</sup> (QZ4P)

|       |           |           |           |
|-------|-----------|-----------|-----------|
| 1.C   | -1.802932 | 12.933339 | -0.129191 |
| 2.C   | -2.478297 | 13.894924 | 0.626319  |
| 3.C   | -2.030573 | 15.220743 | 0.595631  |
| 4.C   | -0.922616 | 15.577492 | -0.180755 |
| 5.C   | -0.258719 | 14.601121 | -0.931429 |
| 6.C   | -0.695225 | 13.271387 | -0.910462 |
| 7.H   | -3.339189 | 13.613605 | 1.225470  |
| 8.H   | -2.553728 | 15.973583 | 1.181308  |
| 9.H   | -0.579702 | 16.609054 | -0.201435 |
| 10.H  | 0.602818  | 14.869701 | -1.538969 |
| 11.H  | -0.184613 | 12.510533 | -1.493234 |
| 12.Br | -2.415224 | 11.098035 | -0.095915 |
| 13.O  | -3.317305 | 8.135432  | 0.267336  |
| 14.C  | -2.686944 | 7.762645  | 1.258550  |
| 15.C  | -1.170908 | 7.863857  | 1.360628  |
| 16.N  | -3.346095 | 7.221009  | 2.346519  |
| 17.H  | -4.358808 | 7.239625  | 2.264769  |
| 18.C  | -2.751764 | 6.756455  | 3.596649  |
| 19.H  | -1.915770 | 7.396562  | 3.895024  |
| 20.C  | -2.222452 | 5.300856  | 3.620273  |
| 21.H  | -3.501250 | 6.831392  | 4.391586  |

|      |           |          |          |
|------|-----------|----------|----------|
| 22.H | -0.717474 | 6.917879 | 1.676703 |
| 23.H | -0.892238 | 8.632449 | 2.092190 |
| 24.H | -0.782618 | 8.155337 | 0.384308 |
| 25.O | -1.614402 | 4.890274 | 4.609135 |
| 26.N | -2.488217 | 4.559598 | 2.507333 |
| 27.H | -2.996779 | 5.012267 | 1.755608 |
| 28.C | -2.068961 | 3.167525 | 2.358038 |
| 29.H | -1.398260 | 3.052408 | 1.498070 |
| 30.H | -2.936930 | 2.511131 | 2.222955 |
| 31.H | -1.539447 | 2.881129 | 3.269535 |

**PhBr-NC<sub>5</sub>H<sub>5</sub>**

-3208.04 kcal mol<sup>-1</sup>

-3216.02 kcal mol<sup>-1</sup> (QZ4P)

|       |           |           |           |
|-------|-----------|-----------|-----------|
| 1.C   | -3.034465 | 13.112654 | -0.857302 |
| 2.C   | -3.561600 | 14.091411 | -0.010255 |
| 3.C   | -4.015813 | 15.296835 | -0.557694 |
| 4.C   | -3.943780 | 15.520733 | -1.937054 |
| 5.C   | -3.413617 | 14.531178 | -2.772301 |
| 6.C   | -2.956010 | 13.321599 | -2.236958 |
| 7.H   | -3.615931 | 13.914144 | 1.060011  |
| 8.H   | -4.426560 | 16.060433 | 0.099596  |
| 9.H   | -4.297910 | 16.458812 | -2.357670 |
| 10.H  | -3.353526 | 14.696373 | -3.846036 |
| 11.H  | -2.543530 | 12.551348 | -2.882247 |
| 12.Br | -2.400426 | 11.440722 | -0.106299 |
| 13.H  | 0.032368  | 5.562166  | 2.502472  |
| 14.C  | -0.365558 | 6.488866  | 2.095260  |
| 15.C  | -0.407420 | 6.701372  | 0.714619  |

|      |           |          |           |
|------|-----------|----------|-----------|
| 16.C | -0.927958 | 7.909348 | 0.238825  |
| 17.N | -1.392159 | 8.880224 | 1.044383  |
| 18.C | -1.347375 | 8.666269 | 2.370745  |
| 19.C | -0.845299 | 7.492086 | 2.941708  |
| 20.H | -0.045200 | 5.949559 | 0.017269  |
| 21.H | -0.976737 | 8.111587 | -0.831112 |
| 22.H | -1.729906 | 9.471024 | 2.998493  |
| 23.H | -0.832500 | 7.371544 | 4.022450  |

### HOH-NC<sub>5</sub>H<sub>5</sub>

-1899.65 kcal mol<sup>-1</sup>

-1905.34 kcal mol<sup>-1</sup> (QZ4P)

|      |           |           |           |
|------|-----------|-----------|-----------|
| 1.C  | -0.037353 | 0.097683  | -2.110854 |
| 2.C  | -0.019116 | -1.142664 | -0.051770 |
| 3.C  | -0.033850 | -1.133289 | -1.449392 |
| 4.H  | -0.031462 | 2.248628  | -1.820330 |
| 5.H  | -0.007717 | 2.050151  | 0.674658  |
| 6.C  | -0.012497 | 1.161408  | 0.044747  |
| 7.H  | -0.019689 | -2.080751 | 0.502002  |
| 8.C  | -0.026948 | 1.269020  | -1.348794 |
| 9.H  | -0.043888 | -2.070056 | -2.001146 |
| 10.H | -0.049337 | 0.143232  | -3.197365 |
| 11.N | -0.006902 | -0.019666 | 0.689483  |
| 12.O | -0.247244 | -0.195973 | 3.557831  |
| 13.H | -0.113094 | -0.126327 | 2.578894  |
| 14.H | 0.649097  | -0.201396 | 3.932036  |

### HOH-HCHO

-817.5 kcal mol<sup>-1</sup>

-820.08 kcal mol<sup>-1</sup> (QZ4P)

|     |           |           |          |
|-----|-----------|-----------|----------|
| 1.C | 1.406343  | -0.096092 | 0.000000 |
| 2.H | 2.506111  | -0.254353 | 0.000000 |
| 3.H | 1.047328  | 0.954231  | 0.000000 |
| 4.O | -1.785601 | 0.531928  | 0.000000 |
| 5.H | -2.660858 | 0.111249  | 0.000000 |
| 6.O | 0.633036  | -1.035359 | 0.000000 |
| 7.H | -1.146360 | -0.211604 | 0.000000 |

### SI 3 | Basis superposition error (BSSE) for optimized complexes

The basis superposition error (BSSE) related to the monomers and complex is reported.

| set         | Complex                               | BSSE <sub>DONOR</sub> (kcal mol <sup>-1</sup> ) | BSSE <sub>ACCEPTOR</sub> (kcal mol <sup>-1</sup> ) | BSSE <sub>TOT</sub> (kcal mol <sup>-1</sup> ) |
|-------------|---------------------------------------|-------------------------------------------------|----------------------------------------------------|-----------------------------------------------|
| <b>1-3</b>  | 1                                     | 0.17                                            | 0.08                                               | 0.25                                          |
|             | 2                                     | 0.19                                            | 0.08                                               | 0.27                                          |
|             | <b>3</b>                              | 0.23                                            | 0.07                                               | 0.30                                          |
| <b>1-9</b>  | 1                                     | 0.17                                            | 0.08                                               | 0.25                                          |
|             | 4                                     | 0.19                                            | 0.12                                               | 0.31                                          |
|             | 5                                     | 0.20                                            | 0.10                                               | 0.30                                          |
|             | 6                                     | 0.24                                            | 0.08                                               | 0.32                                          |
|             | 7                                     | 0.23                                            | 0.07                                               | 0.30                                          |
|             | 8                                     | 0.24                                            | 0.07                                               | 0.31                                          |
|             | <b>9</b>                              | 0.24                                            | 0.08                                               | 0.32                                          |
| <b>1-6'</b> | 1                                     | 0.17                                            | 0.08                                               | 0.25                                          |
|             | 4                                     | 0.19                                            | 0.12                                               | 0.31                                          |
|             | 5'                                    | 0.24                                            | 0.09                                               | 0.33                                          |
|             | <b>6'</b>                             | 0.28                                            | 0.08                                               | 0.36                                          |
|             | HOH•••O=CH <sub>2</sub>               | 0.22                                            | 0.11                                               | 0.33                                          |
|             | HOH•••NC <sub>5</sub> H <sub>5</sub>  | 0.32                                            | 0.08                                               | 0.40                                          |
|             | PhBr•••NC <sub>5</sub> H <sub>5</sub> | 0.27                                            | 0.07                                               | 0.34                                          |

## SI 4 | Energy Decomposition Analysis of XB complexes.

Energy decomposition analysis of the halogen bond complexes is reported. Each energetic term is given in kcal mol<sup>-1</sup> as a contribution to the overall interaction energy.

| set         | Complex | $\Delta V_{\text{Estat}}$ | $\Delta E_{\text{Pauli}}$ | $\Delta E_{\text{O}_i}$ | $\Delta E_{\text{Disp}}$ | $\Delta E_{\text{int}}$ |
|-------------|---------|---------------------------|---------------------------|-------------------------|--------------------------|-------------------------|
| <b>1-3</b>  | 1       | -2.54                     | 3.70                      | -1.41                   | -1.86                    | -2.11                   |
|             | 2       | -2.86                     | 4.25                      | -1.69                   | -1.99                    | -2.29                   |
|             | 3       | -3.55                     | 5.63                      | -2.20                   | -2.38                    | -2.50                   |
| <b>1-9</b>  | 1       | -2.54                     | 3.70                      | -1.41                   | -1.86                    | -2.11                   |
|             | 4       | -3.24                     | 4.81                      | -2.03                   | -2.03                    | -2.49                   |
|             | 5       | -3.44                     | 5.15                      | -2.22                   | -2.12                    | -2.63                   |
|             | 6       | -4.09                     | 6.47                      | -2.71                   | -2.49                    | -2.82                   |
|             | 7       | -3.29                     | 5.17                      | -1.94                   | -2.62                    | -2.68                   |
|             | 8       | -3.09                     | 4.91                      | -1.75                   | -2.78                    | -2.72                   |
|             | 9       | -3.04                     | 4.87                      | -1.73                   | -2.83                    | -2.73                   |
| <b>1-6'</b> | 1       | -2.54                     | 3.70                      | -1.41                   | -1.86                    | -2.11                   |
|             | 4       | -3.24                     | 4.81                      | -2.03                   | -2.03                    | -2.49                   |
|             | 5'      | -3.97                     | 6.23                      | -2.46                   | -2.64                    | -2.83                   |
|             | 6'      | -4.03                     | 6.59                      | -2.46                   | -3.40                    | -3.29                   |

## SI 5| Analysis of intramolecular and intermolecular hydrogen bonds.

The C-H bond length in Å is reported, as referring to the hydrogen atom closest to the bromine, for both monomers and dimers. H•••O distances before and after complexation are also reported. Finally, the H•••Br distance in the dimer is described.

|           | <b>C-H<br/>monomer</b> | <b>C-H<br/>dimer</b> | <b><math>\Delta</math> (C-H)</b> | <b>H•••O<br/>monomer</b> | <b>H•••O<br/>dimer</b> | <b>H•••Br</b> |
|-----------|------------------------|----------------------|----------------------------------|--------------------------|------------------------|---------------|
| <b>1</b>  | 1.115                  | 1.113                | -0.002                           | 2.035                    | 2.032                  | 3.165         |
| <b>2</b>  | 1.119                  | 1.117                | -0.002                           | 2.026                    | 2.022                  | 3.163         |
| <b>3</b>  | 1.092                  | 1.092                | 0.000                            | 2.548                    | 2.556                  | 3.032         |
| <b>4</b>  | 1.112                  | 1.110                | -0.002                           | 2.052                    | 2.049                  | 3.149         |
| <b>5</b>  | 1.113                  | 1.111                | -0.002                           | 2.055                    | 2.052                  | 3.146         |
| <b>6</b>  | 1.091                  | 1.090                | -0.001                           | 2.533                    | 2.543                  | 3.006         |
| <b>7</b>  | 1.091                  | 1.090                | -0.001                           | 2.532                    | 2.536                  | 3.182         |
| <b>8</b>  | 1.091                  | 1.090                | -0.001                           | 2.534                    | 2.537                  | 3.352         |
| <b>9</b>  | 1.091                  | 1.090                | -0.001                           | 2.534                    | 2.537                  | 3.398         |
| <b>5'</b> | 1.095                  | 1.095                | 0.000                            | 2.715                    | 2.718                  | 3.381         |
| <b>6'</b> | 1.094                  | 1.093                | -0.001                           | 2.646                    | 2.712                  | 3.197         |

## SI 6 | Cartesian coordinates of constrained complexes

Cartesian coordinates (Å) and total bonding energies (kcal mol<sup>-1</sup>) of complexes obtained by letting the monomers approach each other as blocks, computed at the BLYP-D3(BJ)/TZ2P level of theory. The coordinates of PhBr-NC<sub>5</sub>H<sub>5</sub> and HOH-NC<sub>5</sub>H<sub>5</sub> at each step are reported.

### PhBr-NC<sub>5</sub>H<sub>5</sub> (1)

-3208.02 kcal mol<sup>-1</sup>

|       |           |           |           |
|-------|-----------|-----------|-----------|
| 1.C   | -3.031528 | 13.124814 | -0.868580 |
| 2.C   | -3.559284 | 14.099907 | -0.017762 |
| 3.C   | -4.041525 | 15.294974 | -0.563890 |
| 4.C   | -3.996508 | 15.512158 | -1.945452 |
| 5.C   | -3.465204 | 14.526291 | -2.784313 |
| 6.C   | -2.979719 | 13.326946 | -2.250472 |
| 7.H   | -3.592542 | 13.927807 | 1.054182  |
| 8.H   | -4.452903 | 16.055767 | 0.096237  |
| 9.H   | -4.372399 | 16.442218 | -2.364984 |
| 10.H  | -3.425973 | 14.686310 | -3.859789 |
| 11.H  | -2.566358 | 12.559540 | -2.898539 |
| 12.Br | -2.360288 | 11.467160 | -0.119574 |
| 13.H  | -0.011262 | 5.538484  | 2.529573  |
| 14.C  | -0.376077 | 6.475319  | 2.114622  |
| 15.C  | -0.381793 | 6.689593  | 0.733649  |
| 16.C  | -0.860858 | 7.910671  | 0.247689  |
| 17.N  | -1.317852 | 8.892852  | 1.043636  |
| 18.C  | -1.307886 | 8.676949  | 2.370417  |
| 19.C  | -0.848861 | 7.490044  | 2.951202  |
| 20.H  | -0.023551 | 5.929099  | 0.043690  |
| 21.H  | -0.881050 | 8.114108  | -0.822956 |
| 22.H  | -1.684014 | 9.490632  | 2.990487  |
| 23.H  | -0.863475 | 7.368645  | 4.031830  |



**PhBr-NC<sub>5</sub>H<sub>5</sub> (2)**

-3208.01 kcal mol<sup>-1</sup>

|       |           |           |            |
|-------|-----------|-----------|------------|
| 1.C   | -0.022552 | 2.413526  | 0.000000   |
| 2.C   | -0.010742 | 3.102296  | 1.216128   |
| 3.C   | 0.013435  | 4.501766  | 1.209666   |
| 4.C   | 0.025765  | 5.205002  | 0.000000   |
| 5.C   | 0.013435  | 4.501766  | -1.209666  |
| 6.C   | -0.010742 | 3.102296  | -1.216128  |
| 7.H   | -0.020058 | 2.553315  | 2.153400   |
| 8.H   | 0.022746  | 5.039960  | 2.155251   |
| 9.H   | 0.044790  | 6.292199  | 0.000000   |
| 10.H  | 0.022746  | 5.039960  | -2.155251  |
| 11.H  | -0.020058 | 2.553315  | -2.153400  |
| 12.Br | -0.053238 | 0.473294  | 0.000000   |
| 13.H  | 0.088899  | -6.354245 | 0.000000   |
| 14.C  | 0.046349  | -5.267458 | 0.000000   |
| 15.C  | 0.018446  | -4.554763 | -1.201816  |
| 16.C  | -0.036239 | -3.158032 | -1.150601- |
| 17.N  | -0.063431 | -2.463515 | 0.000000   |
| 18.C  | -0.036239 | -3.158032 | 1.150601   |
| 19.C  | 0.018446  | -4.554763 | 1.201816   |
| 20.H  | 0.038481  | -5.066475 | -2.161223  |
| 21.H  | -0.059360 | -2.567470 | -2.066417  |
| 22.H  | -0.059360 | -2.567470 | 2.066417   |
| 23.H  | 0.038481  | -5.066475 | 2.161223   |

**PhBr-NC<sub>5</sub>H<sub>5</sub> (3)**

-3207.92 kcal mol<sup>-1</sup>

|       |           |           |           |
|-------|-----------|-----------|-----------|
| 1.C   | -0.024444 | 2.383492  | 0.000000  |
| 2.C   | -0.012188 | 3.072852  | 1.215881  |
| 3.C   | 0.012900  | 4.472326  | 1.209653  |
| 4.C   | 0.025706  | 5.175618  | 0.000000  |
| 5.C   | 0.012900  | 4.472326  | -1.209653 |
| 6.C   | -0.012188 | 3.072852  | -1.215881 |
| 7.H   | -0.021851 | 2.524035  | 2.153326  |
| 8.H   | 0.022571  | 5.010579  | 2.155231  |
| 9.H   | 0.045484  | 6.262819  | 0.000000  |
| 10.H  | 0.022571  | 5.010579  | -2.155231 |
| 11.H  | -0.021851 | 2.524035  | -2.153326 |
| 12.Br | -0.056127 | 0.441652  | 0.000000  |
| 13.H  | 0.097790  | -6.321501 | 0.000000  |
| 14.C  | 0.051260  | -5.234893 | 0.000000  |
| 15.C  | 0.020844  | -4.522412 | -1.201904 |
| 16.C  | -0.038308 | -3.125948 | -1.150829 |
| 17.N  | -0.067892 | -2.432008 | 0.000000  |
| 18.C  | -0.038308 | -3.125948 | 1.150829  |
| 19.C  | 0.020844  | -4.522412 | 1.201904  |
| 20.H  | 0.042803  | -5.034100 | -2.161260 |
| 21.H  | -0.062660 | -2.534921 | -2.066291 |
| 22.H  | -0.062660 | -2.534921 | 2.066291  |
| 23.H  | 0.042803  | -5.034100 | 2.161260  |

**PhBr-NC<sub>5</sub>H<sub>5</sub> (4)**

-3207.73 kcal mol<sup>-1</sup>

|     |           |          |          |
|-----|-----------|----------|----------|
| 1.C | -0.025003 | 2.353675 | 0.000000 |
| 2.C | -0.012610 | 3.043682 | 1.215607 |

|       |           |           |           |
|-------|-----------|-----------|-----------|
| 3.C   | 0.012762  | 4.443177  | 1.209642  |
| 4.C   | 0.025735  | 5.146533  | 0.000000  |
| 5.C   | 0.012762  | 4.443177  | -1.209642 |
| 6.C   | -0.012610 | 3.043682  | -1.215607 |
| 7.H   | -0.022387 | 2.495045  | 2.153248  |
| 8.H   | 0.022542  | 4.981502  | 2.155212  |
| 9.H   | 0.045764  | 6.233749  | 0.000000  |
| 10.H  | 0.022542  | 4.981502  | -2.155212 |
| 11.H  | -0.022387 | 2.495045  | -2.153248 |
| 12.Br | -0.056898 | 0.409898  | 0.000000  |
| 13.H  | 0.099733  | -6.289287 | 0.000000  |
| 14.C  | 0.052376  | -5.202731 | 0.000000  |
| 15.C  | 0.021436  | -4.490383 | -1.201996 |
| 16.C  | -0.038671 | -3.094055 | -1.151074 |
| 17.N  | -0.068663 | -2.400604 | 0.000000  |
| 18.C  | -0.038671 | -3.094055 | 1.151074  |
| 19.C  | 0.021436  | -4.490383 | 1.201996  |
| 20.H  | 0.043781  | -5.002106 | -2.161300 |
| 21.H  | -0.063375 | -2.502479 | -2.066154 |
| 22.H  | -0.063375 | -2.502479 | 2.066154  |
| 23.H  | 0.043781  | -5.002106 | 2.161300  |

**PhBr-NC<sub>5</sub>H<sub>5</sub> (5)**

-3207.42 kcal mol<sup>-1</sup>

|     |           |          |           |
|-----|-----------|----------|-----------|
| 1.C | -0.023479 | 2.324193 | 0.000000  |
| 2.C | -0.011884 | 3.014918 | 1.215304  |
| 3.C | 0.011834  | 4.414470 | 1.209636  |
| 4.C | 0.023943  | 5.117909 | 0.000000  |
| 5.C | 0.011834  | 4.414470 | -1.209636 |

|       |           |           |           |
|-------|-----------|-----------|-----------|
| 6.C   | -0.011884 | 3.014918  | -1.215304 |
| 7.H   | -0.021003 | 2.466459  | 2.153164  |
| 8.H   | 0.020964  | 4.952891  | 2.155195  |
| 9.H   | 0.042634  | 6.205169  | 0.000000  |
| 10.H  | 0.020964  | 4.952891  | -2.155195 |
| 11.H  | -0.021003 | 2.466459  | -2.153164 |
| 12.Br | -0.053083 | 0.378082  | 0.000000  |
| 13.H  | 0.089466  | -6.257997 | 0.000000  |
| 14.C  | 0.047017  | -5.171254 | 0.000000  |
| 15.C  | 0.019299  | -4.458879 | -1.202089 |
| 16.C  | -0.034503 | -3.062401 | -1.151336 |
| 17.N  | -0.061305 | -2.369275 | 0.000000  |
| 18.C  | -0.034503 | -3.062401 | 1.151336  |
| 19.C  | 0.019299  | -4.458879 | 1.202089  |
| 20.H  | 0.039294  | -4.970748 | -2.161341 |
| 21.H  | -0.056599 | -2.470123 | -2.066010 |
| 22.H  | -0.056599 | -2.470123 | 2.066010  |
| 23.H  | 0.039294  | -4.970748 | 2.161341  |

**PhBr-NC<sub>5</sub>H<sub>5</sub> (6)**

-3206.94 kcal mol<sup>-1</sup>

|     |           |          |           |
|-----|-----------|----------|-----------|
| 1.C | -0.021590 | 2.294923 | 0.000000  |
| 2.C | -0.010747 | 2.986420 | 1.214969  |
| 3.C | 0.011433  | 4.386038 | 1.209632  |
| 4.C | 0.022764  | 5.089559 | 0.000000  |
| 5.C | 0.011433  | 4.386038 | -1.209632 |
| 6.C | -0.010747 | 2.986420 | -1.214969 |
| 7.H | -0.019283 | 2.438172 | 2.153078  |
| 8.H | 0.019975  | 4.924573 | 2.155176  |

|       |           |           |           |
|-------|-----------|-----------|-----------|
| 9.H   | 0.040242  | 6.176865  | 0.000000  |
| 10.H  | 0.019975  | 4.924573  | -2.155176 |
| 11.H  | -0.019283 | 2.438172  | -2.153078 |
| 12.Br | -0.049125 | 0.345971  | 0.000000  |
| 13.H  | 0.078363  | -6.226928 | 0.000000  |
| 14.C  | 0.041003  | -5.140017 | 0.000000  |
| 15.C  | 0.016608  | -4.427628 | -1.202189 |
| 16.C  | -0.030720 | -3.031029 | -1.151622 |
| 17.N  | -0.054263 | -2.338235 | 0.000000  |
| 18.C  | -0.030720 | -3.031029 | 1.151622  |
| 19.C  | 0.016608  | -4.427628 | 1.202189  |
| 20.H  | 0.034170  | -4.939615 | -2.161396 |
| 21.H  | -0.050132 | -2.437999 | -2.065857 |
| 22.H  | -0.050132 | -2.437999 | 2.065857  |
| 23.H  | 0.034170  | -4.939615 | 2.161396  |

**PhBr-NC<sub>5</sub>H<sub>5</sub> (7)**

-3206.26 kcal mol<sup>-1</sup>

|      |           |          |           |
|------|-----------|----------|-----------|
| 1.C  | -0.016226 | 2.265891 | 0.000000  |
| 2.C  | -0.005221 | 2.958233 | 1.214590  |
| 3.C  | 0.017211  | 4.357896 | 1.209628  |
| 4.C  | 0.028639  | 5.061493 | 0.000000  |
| 5.C  | 0.017211  | 4.357896 | -1.209628 |
| 6.C  | -0.005221 | 2.958233 | -1.214590 |
| 7.H  | -0.013864 | 2.410260 | 2.153002  |
| 8.H  | 0.025821  | 4.896543 | 2.155156  |
| 9.H  | 0.046253  | 6.148824 | 0.000000  |
| 10.H | 0.025821  | 4.896543 | -2.155156 |
| 11.H | -0.013864 | 2.410260 | -2.153002 |

|       |           |           |           |
|-------|-----------|-----------|-----------|
| 12.Br | -0.044204 | 0.313607  | 0.000000  |
| 13.H  | 0.057064  | -6.196219 | 0.000000  |
| 14.C  | 0.026991  | -5.109104 | 0.000000  |
| 15.C  | 0.007348  | -4.396682 | -1.202304 |
| 16.C  | -0.030796 | -2.999933 | -1.151943 |
| 17.N  | -0.049768 | -2.307440 | 0.000000  |
| 18.C  | -0.030796 | -2.999933 | 1.151943  |
| 19.C  | 0.007348  | -4.396682 | 1.202304  |
| 20.H  | 0.021479  | -4.908839 | -2.161446 |
| 21.H  | -0.046353 | -2.406004 | -2.065658 |
| 22.H  | -0.046353 | -2.406004 | 2.065658  |
| 23.H  | 0.021479  | -4.908839 | 2.161446  |

**PhBr-NC<sub>5</sub>H<sub>5</sub> (8)**

-3205.31 kcal mol<sup>-1</sup>

|       |           |           |           |
|-------|-----------|-----------|-----------|
| 1.C   | -0.016840 | 2.236824  | 0.000000  |
| 2.C   | -0.003445 | 2.930025  | 1.214175  |
| 3.C   | 0.023847  | 4.329657  | 1.209632  |
| 4.C   | 0.037790  | 5.033279  | 0.000000  |
| 5.C   | 0.023847  | 4.329657  | -1.209632 |
| 6.C   | -0.003445 | 2.930025  | -1.214175 |
| 7.H   | -0.013930 | 2.382367  | 2.152917  |
| 8.H   | 0.034374  | 4.868399  | 2.155141  |
| 9.H   | 0.059316  | 6.120568  | 0.000000  |
| 10.H  | 0.034374  | 4.868399  | -2.155141 |
| 11.H  | -0.013930 | 2.382367  | -2.152917 |
| 12.Br | -0.050736 | 0.280722  | 0.000000  |
| 13.H  | 0.066701  | -6.164502 | 0.000000  |
| 14.C  | 0.029774  | -5.077628 | 0.000000  |

|      |           |           |           |
|------|-----------|-----------|-----------|
| 15.C | 0.005690  | -4.365437 | -1.202404 |
| 16.C | -0.040839 | -2.969112 | -1.152289 |
| 17.N | -0.063813 | -2.277139 | 0.000000  |
| 18.C | -0.040839 | -2.969112 | 1.152289  |
| 19.C | 0.005690  | -4.365437 | 1.202404  |
| 20.H | 0.022989  | -4.877512 | -2.161508 |
| 21.H | -0.059782 | -2.374449 | -2.065454 |
| 22.H | -0.059782 | -2.374449 | 2.065454  |
| 23.H | 0.022989  | -4.877512 | 2.161508  |

**PhBr- NC<sub>5</sub>H<sub>5</sub> (9)**

-3204.06 kcal mol<sup>-1</sup>

|       |           |           |           |
|-------|-----------|-----------|-----------|
| 1.C   | -0.017745 | 2.208292  | 0.000000  |
| 2.C   | -0.005499 | 2.902504  | 1.213713  |
| 3.C   | 0.019417  | 4.302251  | 1.209642  |
| 4.C   | 0.032141  | 5.005968  | 0.000000  |
| 5.C   | 0.019417  | 4.302251  | -1.209642 |
| 6.C   | -0.005499 | 2.902504  | -1.213713 |
| 7.H   | -0.015046 | 2.355160  | 2.152838  |
| 8.H   | 0.029034  | 4.841160  | 2.155128  |
| 9.H   | 0.051797  | 6.093327  | 0.000000  |
| 10.H  | 0.029034  | 4.841160  | -2.155128 |
| 11.H  | -0.015046 | 2.355160  | -2.152838 |
| 12.Br | -0.048307 | 0.247411  | 0.000000  |
| 13.H  | 0.064979  | -6.134122 | 0.000000  |
| 14.C  | 0.030522  | -5.047198 | 0.000000  |
| 15.C  | 0.008030  | -4.335045 | -1.202504 |
| 16.C  | -0.035371 | -2.938850 | -1.152691 |
| 17.N  | -0.056727 | -2.247311 | 0.000000  |

|      |           |           |           |
|------|-----------|-----------|-----------|
| 18.C | -0.035371 | -2.938850 | 1.152691  |
| 19.C | 0.008030  | -4.335045 | 1.202504  |
| 20.H | 0.024133  | -4.847199 | -2.161557 |
| 21.H | -0.053029 | -2.343164 | -2.065199 |
| 22.H | -0.053029 | -2.343164 | 2.065199  |
| 23.H | 0.024133  | -4.847199 | 2.161557  |

**PhBr- NC<sub>5</sub>H<sub>5</sub> (10)**

-3202.46 kcal mol<sup>-1</sup>

|       |           |           |           |
|-------|-----------|-----------|-----------|
| 1.C   | -0.015347 | 2.180085  | 0.000000  |
| 2.C   | -0.002248 | 2.875371  | 1.213197  |
| 3.C   | 0.024371  | 4.275172  | 1.209657  |
| 4.C   | 0.037978  | 4.978945  | 0.000000  |
| 5.C   | 0.024371  | 4.275172  | -1.209657 |
| 6.C   | -0.002248 | 2.875371  | -1.213197 |
| 7.H   | -0.012426 | 2.328426  | 2.152768  |
| 8.H   | 0.034630  | 4.814243  | 2.155115  |
| 9.H   | 0.058975  | 6.066318  | 0.000000  |
| 10.H  | 0.034630  | 4.814243  | -2.155115 |
| 11.H  | -0.012426 | 2.328426  | -2.152768 |
| 12.Br | -0.047946 | 0.213582  | 0.000000  |
| 13.H  | 0.057095  | -6.103967 | 0.000000  |
| 14.C  | 0.024259  | -5.017031 | 0.000000  |
| 15.C  | 0.002836  | -4.304925 | -1.202595 |
| 16.C  | -0.038389 | -2.908985 | -1.153156 |
| 17.N  | -0.058567 | -2.217974 | 0.000000  |
| 18.C  | -0.038389 | -2.908985 | 1.153156  |
| 19.C  | 0.002836  | -4.304925 | 1.202595  |
| 20.H  | 0.018123  | -4.817162 | -2.161589 |



|      |           |           |           |
|------|-----------|-----------|-----------|
| 21.H | -0.055120 | -2.312118 | -2.064887 |
| 22.H | -0.055120 | -2.312118 | 2.064887  |
| 23.H | 0.018123  | -4.817162 | 2.161589  |

**PhBr- NC<sub>5</sub>H<sub>5</sub> (11)**

-3200.47 kcal mol<sup>-1</sup>

|       |           |           |           |
|-------|-----------|-----------|-----------|
| 1.C   | -0.014614 | 2.152411  | 0.000000  |
| 2.C   | -0.001839 | 2.848894  | 1.212625  |
| 3.C   | 0.024060  | 4.248810  | 1.209682  |
| 4.C   | 0.037281  | 4.952662  | 0.000000  |
| 5.C   | 0.024060  | 4.248810  | -1.209682 |
| 6.C   | -0.001839 | 2.848894  | -1.212625 |
| 7.H   | -0.011726 | 2.302386  | 2.152709  |
| 8.H   | 0.034048  | 4.788085  | 2.155107  |
| 9.H   | 0.057695  | 6.040090  | 0.000000  |
| 10.H  | 0.034048  | 4.788085  | -2.155107 |
| 11.H  | -0.011726 | 2.302386  | -2.152709 |
| 12.Br | -0.046032 | 0.179168  | 0.000000  |
| 13.H  | 0.051643  | -6.074532 | 0.000000  |
| 14.C  | 0.021362  | -4.987569 | 0.000000  |
| 15.C  | 0.001623  | -4.275463 | -1.202676 |
| 16.C  | -0.036350 | -2.879809 | -1.153678 |
| 17.N  | -0.054837 | -2.189237 | 0.000000  |
| 18.C  | -0.036350 | -2.879809 | 1.153678  |
| 19.C  | 0.001623  | -4.275463 | 1.202676  |
| 20.H  | 0.015663  | -4.787772 | -2.161621 |
| 21.H  | -0.051727 | -2.281628 | -2.064545 |
| 22.H  | -0.051727 | -2.281628 | 2.064545  |
| 23.H  | 0.015663  | -4.787772 | 2.161621  |

**PhBr- NC<sub>5</sub>H<sub>5</sub> (12)**-3198.00 kcal mol<sup>-1</sup>

|       |           |           |           |
|-------|-----------|-----------|-----------|
| 1.C   | -0.010323 | 2.125415  | 0.000000  |
| 2.C   | 0.003551  | 2.823188  | 1.211990  |
| 3.C   | 0.031596  | 4.223182  | 1.209717  |
| 4.C   | 0.045901  | 4.927080  | 0.000000  |
| 5.C   | 0.031596  | 4.223182  | -1.209717 |
| 6.C   | 0.003551  | 2.823188  | -1.211990 |
| 7.H   | -0.007159 | 2.277204  | 2.152667  |
| 8.H   | 0.042390  | 4.762670  | 2.155104  |
| 9.H   | 0.067978  | 6.014525  | 0.000000  |
| 10.H  | 0.042390  | 4.762670  | -2.155104 |
| 11.H  | -0.007159 | 2.277204  | -2.152667 |
| 12.Br | -0.044583 | 0.144198  | 0.000000  |
| 13.H  | 0.037093  | -6.045895 | 0.000000  |
| 14.C  | 0.010446  | -4.958890 | 0.000000  |
| 15.C  | -0.006933 | -4.246722 | -1.202742 |
| 16.C  | -0.040242 | -2.851375 | -1.154261 |
| 17.N  | -0.056320 | -2.161035 | 0.000000  |
| 18.C  | -0.040242 | -2.851375 | 1.154261  |
| 19.C  | -0.006933 | -4.246722 | 1.202742  |
| 20.H  | 0.005357  | -4.759074 | -2.161655 |
| 21.H  | -0.053656 | -2.251772 | -2.064192 |
| 22.H  | -0.053656 | -2.251772 | 2.064192  |
| 23.H  | 0.005357  | -4.759074 | 2.161655  |

**PhBr- NC<sub>5</sub>H<sub>5</sub> (13)**

-3194.93 kcal mol<sup>-1</sup>

|       |           |           |           |
|-------|-----------|-----------|-----------|
| 1.C   | -0.004944 | 2.099218  | 0.000000  |
| 2.C   | 0.010472  | 2.798426  | 1.211281  |
| 3.C   | 0.041512  | 4.198500  | 1.209761  |
| 4.C   | 0.057335  | 4.902436  | 0.000000  |
| 5.C   | 0.041512  | 4.198500  | -1.209761 |
| 6.C   | 0.010472  | 2.798426  | -1.211281 |
| 7.H   | -0.001415 | 2.253071  | 2.152655  |
| 8.H   | 0.053453  | 4.738226  | 2.155104  |
| 9.H   | 0.081734  | 5.989886  | 0.000000  |
| 10.H  | 0.053453  | 4.738226  | -2.155104 |
| 11.H  | -0.001415 | 2.253071  | -2.152655 |
| 12.Br | -0.043456 | 0.108505  | 0.000000  |
| 13.H  | 0.019986  | -6.018203 | 0.000000  |
| 14.C  | -0.002801 | -4.931173 | 0.000000  |
| 15.C  | -0.017660 | -4.218878 | -1.202780 |
| 16.C  | -0.045995 | -2.823910 | -1.154918 |
| 17.N  | -0.059481 | -2.133543 | 0.000000  |
| 18.C  | -0.045995 | -2.823910 | 1.154918  |
| 19.C  | -0.017660 | -4.218878 | 1.202780  |
| 20.H  | -0.007245 | -4.731196 | -2.161700 |
| 21.H  | -0.057308 | -2.222803 | -2.063843 |
| 22.H  | -0.057308 | -2.222803 | 2.063843  |
| 23.H  | -0.007245 | -4.731196 | 2.161700  |

**PhBr- NC<sub>5</sub>H<sub>5</sub> (14)**

-3191.16 kcal mol<sup>-1</sup>

|     |          |          |          |
|-----|----------|----------|----------|
| 1.C | 0.006170 | 2.074008 | 0.000000 |
|-----|----------|----------|----------|

|       |           |           |           |
|-------|-----------|-----------|-----------|
| 2.C   | 0.025473  | 2.774757  | 1.210495  |
| 3.C   | 0.064179  | 4.174802  | 1.209816  |
| 4.C   | 0.083877  | 4.878708  | 0.000000  |
| 5.C   | 0.064179  | 4.174802  | -1.209816 |
| 6.C   | 0.025473  | 2.774757  | -1.210495 |
| 7.H   | 0.010645  | 2.230181  | 2.152681  |
| 8.H   | 0.079076  | 4.714754  | 2.155108  |
| 9.H   | 0.114246  | 5.966069  | 0.000000  |
| 10.H  | 0.079076  | 4.714754  | -2.155108 |
| 11.H  | 0.010645  | 2.230181  | -2.152681 |
| 12.Br | -0.043017 | 0.072084  | 0.000000  |
| 13.H  | -0.013618 | -5.991620 | 0.000000  |
| 14.C  | -0.029989 | -4.904551 | 0.000000  |
| 15.C  | -0.040653 | -4.192009 | -1.202773 |
| 16.C  | -0.060742 | -2.797472 | -1.155662 |
| 17.N  | -0.069971 | -2.106697 | 0.000000  |
| 18.C  | -0.060742 | -2.797472 | 1.155662  |
| 19.C  | -0.040653 | -4.192009 | 1.202773  |
| 20.H  | -0.033331 | -4.704228 | -2.161741 |
| 21.H  | -0.068496 | -2.194786 | -2.063522 |
| 22.H  | -0.068496 | -2.194786 | 2.063522  |
| 23.H  | -0.033331 | -4.704228 | 2.161741  |

**PhBr- NC<sub>5</sub>H<sub>5</sub> (15)**

-3186.54 kcal mol<sup>-1</sup>

|     |          |          |          |
|-----|----------|----------|----------|
| 1.C | 0.018612 | 2.049964 | 0.000000 |
| 2.C | 0.041582 | 2.752448 | 1.209625 |
| 3.C | 0.087379 | 4.152469 | 1.209885 |
| 4.C | 0.110606 | 4.856336 | 0.000000 |

|       |           |           |           |
|-------|-----------|-----------|-----------|
| 5.C   | 0.087379  | 4.152469  | -1.209885 |
| 6.C   | 0.041582  | 2.752448  | -1.209625 |
| 7.H   | 0.023998  | 2.208793  | 2.152762  |
| 8.H   | 0.105007  | 4.692677  | 2.155123  |
| 9.H   | 0.146425  | 5.943599  | 0.000000  |
| 10.H  | 0.105007  | 4.692677  | -2.155123 |
| 11.H  | 0.023998  | 2.208793  | -2.152762 |
| 12.Br | -0.041164 | 0.034687  | 0.000000  |
| 13.H  | -0.052715 | -5.966400 | 0.000000  |
| 14.C  | -0.060408 | -4.879326 | 0.000000  |
| 15.C  | -0.065396 | -4.166412 | -1.202700 |
| 16.C  | -0.074450 | -2.772439 | -1.156520 |
| 17.N  | -0.078116 | -2.080780 | 0.000000  |
| 18.C  | -0.074450 | -2.772439 | 1.156520  |
| 19.C  | -0.065396 | -4.166412 | 1.202700  |
| 20.H  | -0.062196 | -4.678424 | -2.161770 |
| 21.H  | -0.077544 | -2.168152 | -2.063263 |
| 22.H  | -0.077544 | -2.168152 | 2.063263  |
| 23.H  | -0.062196 | -4.678424 | 2.161770  |

**PhBr- NC<sub>5</sub>H<sub>5</sub> (16)**

-3180.93 kcal mol<sup>-1</sup>

|     |          |          |           |
|-----|----------|----------|-----------|
| 1.C | 0.027022 | 2.027387 | 0.000000  |
| 2.C | 0.052497 | 2.731888 | 1.208665  |
| 3.C | 0.103058 | 4.131963 | 1.209968  |
| 4.C | 0.128663 | 4.835822 | 0.000000  |
| 5.C | 0.103058 | 4.131963 | -1.209968 |
| 6.C | 0.052497 | 2.731888 | -1.208665 |
| 7.H | 0.033056 | 2.189295 | 2.152919  |

|       |           |           |           |
|-------|-----------|-----------|-----------|
| 8.H   | 0.122495  | 4.672486  | 2.155147  |
| 9.H   | 0.168130  | 5.923037  | 0.000000  |
| 10.H  | 0.122495  | 4.672486  | -2.155147 |
| 11.H  | 0.033056  | 2.189295  | -2.152919 |
| 12.Br | -0.040305 | -0.003957 | 0.000000  |
| 13.H  | -0.079342 | -5.942873 | 0.000000  |
| 14.C  | -0.081041 | -4.855886 | 0.000000  |
| 15.C  | -0.082126 | -4.142471 | -1.202540 |
| 16.C  | -0.083583 | -2.749290 | -1.157521 |
| 17.N  | -0.083308 | -2.056138 | 0.000000  |
| 18.C  | -0.083583 | -2.749290 | 1.157521  |
| 19.C  | -0.082126 | -4.142471 | 1.202540  |
| 20.H  | -0.081833 | -4.654122 | -2.161783 |
| 21.H  | -0.083475 | -2.143444 | -2.063116 |
| 22.H  | -0.083475 | -2.143444 | 2.063116  |
| 23.H  | -0.081833 | -4.654122 | 2.161783  |

**PhBr- NC<sub>5</sub>H<sub>5</sub> (17)**

-3174.16 kcal mol<sup>-1</sup>

|      |          |          |           |
|------|----------|----------|-----------|
| 1.C  | 0.051301 | 2.006215 | 0.000000  |
| 2.C  | 0.084291 | 2.712826 | 1.207607  |
| 3.C  | 0.149250 | 4.112554 | 1.210062  |
| 4.C  | 0.182009 | 4.816199 | 0.000000  |
| 5.C  | 0.149250 | 4.112554 | -1.210062 |
| 6.C  | 0.084291 | 2.712826 | -1.207607 |
| 7.H  | 0.059220 | 2.171664 | 2.153173  |
| 8.H  | 0.174238 | 4.653266 | 2.155181  |
| 9.H  | 0.232500 | 5.903043 | 0.000000  |
| 10.H | 0.174238 | 4.653266 | -2.155181 |

|       |           |           |           |
|-------|-----------|-----------|-----------|
| 11.H  | 0.059220  | 2.171664  | -2.153173 |
| 12.Br | -0.039191 | -0.043634 | 0.000000  |
| 13.H  | -0.151830 | -5.920465 | 0.000000  |
| 14.C  | -0.138652 | -4.833686 | 0.000000  |
| 15.C  | -0.129977 | -4.119620 | -1.202268 |
| 16.C  | -0.112574 | -2.727520 | -1.158699 |
| 17.N  | -0.102739 | -2.032092 | 0.000000  |
| 18.C  | -0.112574 | -2.727520 | 1.158699  |
| 19.C  | -0.129977 | -4.119620 | 1.202268  |
| 20.H  | -0.136727 | -4.630705 | -2.161769 |
| 21.H  | -0.104420 | -2.120255 | -2.063151 |
| 22.H  | -0.104420 | -2.120255 | 2.063151  |
| 23.H  | -0.136727 | -4.630705 | 2.161769  |

**PhBr- NC<sub>5</sub>H<sub>5</sub> (18)**

-3166.05 kcal mol<sup>-1</sup>

|       |           |           |           |
|-------|-----------|-----------|-----------|
| 1.C   | 0.086576  | 1.986436  | 0.000000  |
| 2.C   | 0.131450  | 2.695195  | 1.206456  |
| 3.C   | 0.219158  | 4.093932  | 1.210170  |
| 4.C   | 0.263258  | 4.797060  | 0.000000  |
| 5.C   | 0.219158  | 4.093932  | -1.210170 |
| 6.C   | 0.131450  | 2.695195  | -1.206456 |
| 7.H   | 0.097565  | 2.155942  | 2.153555  |
| 8.H   | 0.253000  | 4.634612  | 2.155235  |
| 9.H   | 0.331259  | 5.883041  | 0.000000  |
| 10.H  | 0.253000  | 4.634612  | -2.155235 |
| 11.H  | 0.097565  | 2.155942  | -2.153555 |
| 12.Br | -0.040633 | -0.084508 | 0.000000  |
| 13.H  | -0.255362 | -5.898472 | 0.000000  |

|      |           |           |           |
|------|-----------|-----------|-----------|
| 14.C | -0.222414 | -4.812270 | 0.000000  |
| 15.C | -0.200743 | -4.097505 | -1.201850 |
| 16.C | -0.158148 | -2.707097 | -1.160089 |
| 17.N | -0.135337 | -2.008495 | 0.000000  |
| 18.C | -0.158148 | -2.707097 | 1.160089  |
| 19.C | -0.200743 | -4.097505 | 1.201850  |
| 20.H | -0.216909 | -4.607689 | -2.161710 |
| 21.H | -0.139047 | -2.098786 | -2.063466 |
| 22.H | -0.139047 | -2.098786 | 2.063466  |
| 23.H | -0.216909 | -4.607689 | 2.161710  |

**PhBr- NC<sub>5</sub>H<sub>5</sub> (19)**

-3156.35 kcal mol<sup>-1</sup>

|       |           |           |           |
|-------|-----------|-----------|-----------|
| 1.C   | 0.118760  | 1.968665  | 0.000000  |
| 2.C   | 0.176347  | 2.679783  | 1.205211  |
| 3.C   | 0.288388  | 4.077041  | 1.210285  |
| 4.C   | 0.344740  | 4.779436  | 0.000000  |
| 5.C   | 0.288388  | 4.077041  | -1.210285 |
| 6.C   | 0.176347  | 2.679783  | -1.205211 |
| 7.H   | 0.133320  | 2.142892  | 2.154089  |
| 8.H   | 0.331768  | 4.617510  | 2.155311  |
| 9.H   | 0.431745  | 5.864152  | 0.000000  |
| 10.H  | 0.331768  | 4.617510  | -2.155311 |
| 11.H  | 0.133320  | 2.142892  | -2.154089 |
| 12.Br | -0.046989 | -0.126729 | 0.000000  |
| 13.H  | -0.349251 | -5.878149 | 0.000000  |
| 14.C  | -0.300552 | -4.792713 | 0.000000  |
| 15.C  | -0.268492 | -4.077070 | -1.201269 |
| 16.C  | -0.205381 | -2.688763 | -1.161749 |



|      |           |           |           |
|------|-----------|-----------|-----------|
| 17.N | -0.171269 | -1.985737 | 0.000000  |
| 18.C | -0.205381 | -2.688763 | 1.161749  |
| 19.C | -0.268492 | -4.077070 | 1.201269  |
| 20.H | -0.292446 | -4.586073 | -2.161602 |
| 21.H | -0.177096 | -2.079782 | -2.064163 |
| 22.H | -0.177096 | -2.079782 | 2.064163  |
| 23.H | -0.292446 | -4.586073 | 2.161602  |

**PhBr- NC<sub>5</sub>H<sub>5</sub> (20)**

-3144.76 kcal mol<sup>-1</sup>

|       |           |           |           |
|-------|-----------|-----------|-----------|
| 1.C   | 0.085928  | 1.957125  | 0.000000  |
| 2.C   | 0.130184  | 2.673000  | 1.203890  |
| 3.C   | 0.215140  | 4.072432  | 1.210404  |
| 4.C   | 0.257866  | 4.775967  | 0.000000  |
| 5.C   | 0.215140  | 4.072432  | -1.210404 |
| 6.C   | 0.130184  | 2.673000  | -1.203890 |
| 7.H   | 0.097560  | 2.137376  | 2.154792  |
| 8.H   | 0.247988  | 4.614140  | 2.155400  |
| 9.H   | 0.323784  | 5.862274  | 0.000000  |
| 10.H  | 0.247988  | 4.614140  | -2.155400 |
| 11.H  | 0.097560  | 2.137376  | -2.154792 |
| 12.Br | -0.045667 | -0.172352 | 0.000000  |
| 13.H  | -0.245068 | -5.871594 | 0.000000  |
| 14.C  | -0.215370 | -4.785657 | 0.000000  |
| 15.C  | -0.195913 | -4.067970 | -1.200501 |
| 16.C  | -0.157219 | -2.680261 | -1.163716 |
| 17.N  | -0.134780 | -1.970145 | 0.000000  |
| 18.C  | -0.157219 | -2.680261 | 1.163716  |
| 19.C  | -0.195913 | -4.067970 | 1.200501  |

|      |           |           |           |
|------|-----------|-----------|-----------|
| 20.H | -0.211271 | -4.576256 | -2.161410 |
| 21.H | -0.139814 | -2.070271 | -2.065371 |
| 22.H | -0.139814 | -2.070271 | 2.065371  |
| 23.H | -0.211271 | -4.576256 | 2.161410  |

### HOH- NC<sub>5</sub>H<sub>5</sub> (1)

-1894.85 kcal mol<sup>-1</sup>

|      |           |           |           |
|------|-----------|-----------|-----------|
| 1.C  | -0.121597 | 2.346124  | 0.000000  |
| 2.C  | 0.014774  | 0.238579  | -1.149544 |
| 3.C  | -0.075723 | 1.633588  | -1.201042 |
| 4.H  | -0.109870 | 2.143604  | 2.160938  |
| 5.H  | 0.050962  | -0.346450 | 2.068567  |
| 6.C  | 0.014774  | 0.238579  | 1.149544  |
| 7.H  | 0.050962  | -0.346450 | -2.068567 |
| 8.C  | -0.075723 | 1.633588  | 1.201042  |
| 9.H  | -0.109870 | 2.143604  | -2.160938 |
| 10.H | -0.192070 | 3.431451  | 0.000000  |
| 11.N | 0.061237  | -0.459799 | 0.000000  |
| 12.O | -0.177327 | -4.424291 | 0.000000  |
| 13.H | -0.060052 | -3.457346 | 0.000000  |
| 14.H | 0.729522  | -4.774779 | 0.000000  |

### HOH- NC<sub>5</sub>H<sub>5</sub> (2)

-1895.08 kcal mol<sup>-1</sup>

|     |           |          |           |
|-----|-----------|----------|-----------|
| 1.C | -0.167098 | 2.329208 | 0.000000  |
| 2.C | 0.025268  | 0.226101 | -1.149664 |
| 3.C | -0.102181 | 1.618197 | -1.201074 |
| 4.H | -0.149972 | 2.127136 | 2.160946  |

|      |           |           |           |
|------|-----------|-----------|-----------|
| 5.H  | 0.076906  | -0.357874 | 2.068577  |
| 6.C  | 0.025268  | 0.226101  | 1.149664  |
| 7.H  | 0.076906  | -0.357874 | -2.068577 |
| 8.C  | -0.102181 | 1.618197  | 1.201074  |
| 9.H  | -0.149972 | 2.127136  | -2.160946 |
| 10.H | -0.266717 | 3.412237  | 0.000000  |
| 11.N | 0.090085  | -0.470610 | 0.000000  |
| 12.O | -0.125749 | -4.373308 | 0.000000  |
| 13.H | -0.013462 | -3.405626 | 0.000000  |
| 14.H | 0.782900  | -4.719023 | 0.000000  |

**HOH- NC<sub>5</sub>H<sub>5</sub> (3)**

-1895.32 kcal mol<sup>-1</sup>

|      |           |           |           |
|------|-----------|-----------|-----------|
| 1.C  | -0.161213 | 2.316248  | 0.000000  |
| 2.C  | 0.020094  | 0.212248  | -1.149791 |
| 3.C  | -0.100062 | 1.604963  | -1.201108 |
| 4.H  | -0.145199 | 2.114173  | 2.160954  |
| 5.H  | 0.068599  | -0.372154 | 2.068564  |
| 6.C  | 0.020094  | 0.212248  | 1.149791  |
| 7.H  | 0.068599  | -0.372154 | -2.068564 |
| 8.C  | -0.100062 | 1.604963  | 1.201108  |
| 9.H  | -0.145199 | 2.114173  | -2.160954 |
| 10.H | -0.255101 | 3.399789  | 0.000000  |
| 11.N | 0.081322  | -0.484551 | 0.000000  |
| 12.O | -0.123805 | -4.324781 | 0.000000  |
| 13.H | -0.013639 | -3.356666 | 0.000000  |
| 14.H | 0.785574  | -4.668500 | 0.000000  |

**HOH- NC<sub>5</sub>H<sub>5</sub> (4)**

-1895.58 kcal mol<sup>-1</sup>

|      |           |           |           |
|------|-----------|-----------|-----------|
| 1.C  | -0.155889 | 2.303186  | 0.000000  |
| 2.C  | 0.015707  | 0.198459  | -1.149918 |
| 3.C  | -0.098044 | 1.591675  | -1.201140 |
| 4.H  | -0.140893 | 2.101114  | 2.160958  |
| 5.H  | 0.061444  | -0.386326 | 2.068552  |
| 6.C  | 0.015707  | 0.198459  | 1.149918  |
| 7.H  | 0.061444  | -0.386326 | -2.068552 |
| 8.C  | -0.098044 | 1.591675  | 1.201140  |
| 9.H  | -0.140893 | 2.101114  | -2.160958 |
| 10.H | -0.244758 | 3.387148  | 0.000000  |
| 11.N | 0.073768  | -0.498389 | 0.000000  |
| 12.O | -0.122661 | -4.276053 | 0.000000  |
| 13.H | -0.014172 | -3.307539 | 0.000000  |
| 14.H | 0.787285  | -4.618198 | 0.000000  |

**HOH- NC<sub>5</sub>H<sub>5</sub> (5)**

-1895.85 kcal mol<sup>-1</sup>

|      |           |           |           |
|------|-----------|-----------|-----------|
| 1.C  | -0.152958 | 2.289881  | 0.000000  |
| 2.C  | 0.012988  | 0.184795  | -1.150052 |
| 3.C  | -0.097045 | 1.578273  | -1.201178 |
| 4.H  | -0.138572 | 2.087847  | 2.160969  |
| 5.H  | 0.057080  | -0.400288 | 2.068539  |
| 6.C  | 0.012988  | 0.184795  | 1.150052  |
| 7.H  | 0.057080  | -0.400288 | -2.068539 |
| 8.C  | -0.097045 | 1.578273  | 1.201178  |
| 9.H  | -0.138572 | 2.087847  | -2.160969 |
| 10.H | -0.238924 | 3.374075  | 0.000000  |
| 11.N | 0.069220  | -0.511962 | 0.000000  |

|      |           |           |          |
|------|-----------|-----------|----------|
| 12.O | -0.121319 | -4.226943 | 0.000000 |
| 13.H | -0.013831 | -3.258074 | 0.000000 |
| 14.H | 0.788912  | -4.568232 | 0.000000 |

**HOH- NC<sub>5</sub>H<sub>5</sub> (6)**

-1896.14 kcal mol<sup>-1</sup>

|      |           |           |           |
|------|-----------|-----------|-----------|
| 1.C  | -0.147661 | 2.276693  | 0.000000  |
| 2.C  | 0.010711  | 0.171135  | -1.150204 |
| 3.C  | -0.094319 | 1.564958  | -1.201223 |
| 4.H  | -0.134057 | 2.074716  | 2.160977  |
| 5.H  | 0.052612  | -0.414331 | 2.068507  |
| 6.C  | 0.010711  | 0.171135  | 1.150204  |
| 7.H  | 0.052612  | -0.414331 | -2.068507 |
| 8.C  | -0.094319 | 1.564958  | 1.201223  |
| 9.H  | -0.134057 | 2.074716  | -2.160977 |
| 10.H | -0.229753 | 3.361184  | 0.000000  |
| 11.N | 0.064468  | -0.525532 | 0.000000  |
| 12.O | -0.124925 | -4.177637 | 0.000000  |
| 13.H | -0.017211 | -3.208500 | 0.000000  |
| 14.H | 0.785186  | -4.519162 | 0.000000  |

**HOH- NC<sub>5</sub>H<sub>5</sub> (7)**

-1896.46 kcal mol<sup>-1</sup>

|     |           |           |           |
|-----|-----------|-----------|-----------|
| 1.C | -0.082348 | 2.257673  | 0.000000  |
| 2.C | -0.029213 | 0.146959  | -1.150398 |
| 3.C | -0.064403 | 1.544249  | -1.201285 |
| 4.H | -0.078272 | 2.055404  | 2.160992  |
| 5.H | -0.016300 | -0.440113 | 2.068507  |

|      |           |           |           |
|------|-----------|-----------|-----------|
| 6.C  | -0.029213 | 0.146959  | 1.150398  |
| 7.H  | -0.016300 | -0.440113 | -2.068507 |
| 8.C  | -0.064403 | 1.544249  | 1.201285  |
| 9.H  | -0.078272 | 2.055404  | -2.160992 |
| 10.H | -0.110373 | 3.344908  | 0.000000  |
| 11.N | -0.010901 | -0.551262 | 0.000000  |
| 12.O | -0.113495 | -4.143983 | 0.000000  |
| 13.H | -0.142720 | -3.168998 | 0.000000  |
| 14.H | 0.836214  | -4.351337 | 0.000000  |

**HOH- NC<sub>5</sub>H<sub>5</sub> (8)**

-1896.77 kcal mol<sup>-1</sup>

|      |           |           |           |
|------|-----------|-----------|-----------|
| 1.C  | -0.158956 | 2.239784  | 0.000000  |
| 2.C  | -0.040541 | 0.131841  | -1.150558 |
| 3.C  | -0.118990 | 1.527321  | -1.201326 |
| 4.H  | -0.148801 | 2.037839  | 2.161002  |
| 5.H  | -0.009404 | -0.454775 | 2.068477  |
| 6.C  | -0.040541 | 0.131841  | 1.150558  |
| 7.H  | -0.009404 | -0.454775 | -2.068477 |
| 8.C  | -0.118990 | 1.527321  | 1.201326  |
| 9.H  | -0.148801 | 2.037839  | -2.161002 |
| 10.H | -0.220551 | 3.325626  | 0.000000  |
| 11.N | -0.000490 | -0.565191 | 0.000000  |
| 12.O | 0.042224  | -4.096392 | 0.000000  |
| 13.H | -0.026235 | -3.122956 | 0.000000  |
| 14.H | 0.999480  | -4.265323 | 0.000000  |

**HOH- NC<sub>5</sub>H<sub>5</sub> (9)**

-1897.09 kcal mol<sup>-1</sup>

|      |           |           |           |
|------|-----------|-----------|-----------|
| 1.C  | -0.101345 | 2.229028  | 0.000000  |
| 2.C  | -0.049891 | 0.118504  | -1.150738 |
| 3.C  | -0.084107 | 1.515732  | -1.201386 |
| 4.H  | -0.097602 | 2.026992  | 2.161012  |
| 5.H  | -0.037490 | -0.469097 | 2.068426  |
| 6.C  | -0.049891 | 0.118504  | 1.150738  |
| 7.H  | -0.037490 | -0.469097 | -2.068426 |
| 8.C  | -0.084107 | 1.515732  | 1.201386  |
| 9.H  | -0.097602 | 2.026992  | -2.161012 |
| 10.H | -0.128256 | 3.316285  | 0.000000  |
| 11.N | -0.031861 | -0.579121 | 0.000000  |
| 12.O | -0.033113 | -4.047947 | 0.000000  |
| 13.H | -0.089067 | -3.073202 | 0.000000  |
| 14.H | 0.921822  | -4.229306 | 0.000000  |

**HOH- NC<sub>5</sub>H<sub>5</sub> (10)**

-1897.43 kcal mol<sup>-1</sup>

|      |           |           |           |
|------|-----------|-----------|-----------|
| 1.C  | -0.100040 | 2.215621  | 0.000000  |
| 2.C  | -0.047642 | 0.105253  | -1.150925 |
| 3.C  | -0.082422 | 1.502414  | -1.201443 |
| 4.H  | -0.096191 | 2.013716  | 2.161027  |
| 5.H  | -0.035068 | -0.482636 | 2.068378  |
| 6.C  | -0.047642 | 0.105253  | 1.150925  |
| 7.H  | -0.035068 | -0.482636 | -2.068378 |
| 8.C  | -0.082422 | 1.502414  | 1.201443  |
| 9.H  | -0.096191 | 2.013716  | -2.161027 |
| 10.H | -0.127592 | 3.302858  | 0.000000  |
| 11.N | -0.029402 | -0.592037 | 0.000000  |

|      |           |           |          |
|------|-----------|-----------|----------|
| 12.O | -0.040627 | -3.998292 | 0.000000 |
| 13.H | -0.093330 | -3.022776 | 0.000000 |
| 14.H | 0.913638  | -4.182869 | 0.000000 |

**HOH- NC<sub>5</sub>H<sub>5</sub> (11)**

-1897.76 kcal mol<sup>-1</sup>

|      |           |           |           |
|------|-----------|-----------|-----------|
| 1.C  | -0.066881 | 2.203335  | 0.000000  |
| 2.C  | -0.045600 | 0.092585  | -1.151126 |
| 3.C  | -0.059771 | 1.490047  | -1.201512 |
| 4.H  | -0.066101 | 2.001554  | 2.161044  |
| 5.H  | -0.041767 | -0.495771 | 2.068309  |
| 6.C  | -0.045600 | 0.092585  | 1.151126  |
| 7.H  | -0.041767 | -0.495771 | -2.068309 |
| 8.C  | -0.059771 | 1.490047  | 1.201512  |
| 9.H  | -0.066101 | 2.001554  | -2.161044 |
| 10.H | -0.078538 | 3.290860  | 0.000000  |
| 11.N | -0.037713 | -0.604533 | 0.000000  |
| 12.O | -0.101521 | -3.947744 | 0.000000  |
| 13.H | -0.138401 | -2.970812 | 0.000000  |
| 14.H | 0.849532  | -4.147937 | 0.000000  |

**HOH- NC<sub>5</sub>H<sub>5</sub> (12)**

-1898.10 kcal mol<sup>-1</sup>

|     |           |           |           |
|-----|-----------|-----------|-----------|
| 1.C | -0.102697 | 2.188162  | 0.000000  |
| 2.C | -0.051982 | 0.078068  | -1.151338 |
| 3.C | -0.085629 | 1.475137  | -1.201582 |
| 4.H | -0.099065 | 1.986569  | 2.161062  |
| 5.H | -0.040013 | -0.510552 | 2.068234  |



|      |           |           |           |
|------|-----------|-----------|-----------|
| 6.C  | -0.051982 | 0.078068  | 1.151338  |
| 7.H  | -0.040013 | -0.510552 | -2.068234 |
| 8.C  | -0.085629 | 1.475137  | 1.201582  |
| 9.H  | -0.099065 | 1.986569  | -2.161062 |
| 10.H | -0.129475 | 3.275410  | 0.000000  |
| 11.N | -0.034321 | -0.618499 | 0.000000  |
| 12.O | -0.025827 | -3.900029 | 0.000000  |
| 13.H | -0.083458 | -2.923238 | 0.000000  |
| 14.H | 0.929156  | -4.080251 | 0.000000  |

**HOH- NC<sub>5</sub>H<sub>5</sub> (13)**

-1898.42 kcal mol<sup>-1</sup>

|      |           |           |           |
|------|-----------|-----------|-----------|
| 1.C  | -0.079238 | 2.175088  | 0.000000  |
| 2.C  | -0.059653 | 0.064650  | -1.151563 |
| 3.C  | -0.072795 | 1.461999  | -1.201661 |
| 4.H  | -0.078732 | 1.973649  | 2.161080  |
| 5.H  | -0.056311 | -0.524498 | 2.068142  |
| 6.C  | -0.059653 | 0.064650  | 1.151563  |
| 7.H  | -0.056311 | -0.524498 | -2.068142 |
| 8.C  | -0.072795 | 1.461999  | 1.201661  |
| 9.H  | -0.078732 | 1.973649  | -2.161080 |
| 10.H | -0.089860 | 3.262613  | 0.000000  |
| 11.N | -0.052132 | -0.631688 | 0.000000  |
| 12.O | -0.047408 | -3.851114 | 0.000000  |
| 13.H | -0.103522 | -2.873205 | 0.000000  |
| 14.H | 0.907141  | -4.033295 | 0.000000  |

**HOH- NC<sub>5</sub>H<sub>5</sub> (14)**

-1898.73 kcal mol<sup>-1</sup>

|      |           |           |           |
|------|-----------|-----------|-----------|
| 1.C  | -0.076244 | 2.161609  | 0.000000  |
| 2.C  | -0.060859 | 0.051330  | -1.151802 |
| 3.C  | -0.071199 | 1.448623  | -1.201746 |
| 4.H  | -0.076189 | 1.960365  | 2.161100  |
| 5.H  | -0.058752 | -0.538289 | 2.068033  |
| 6.C  | -0.060859 | 0.051330  | 1.151802  |
| 7.H  | -0.058752 | -0.538289 | -2.068033 |
| 8.C  | -0.071199 | 1.448623  | 1.201746  |
| 9.H  | -0.076189 | 1.960365  | -2.161100 |
| 10.H | -0.084811 | 3.249147  | 0.000000  |
| 11.N | -0.054754 | -0.644613 | 0.000000  |
| 12.O | -0.049557 | -3.802139 | 0.000000  |
| 13.H | -0.105410 | -2.822971 | 0.000000  |
| 14.H | 0.904774  | -3.985091 | 0.000000  |

**HOH- NC<sub>5</sub>H<sub>5</sub> (15)**

-1899.01 kcal mol<sup>-1</sup>

|      |           |           |           |
|------|-----------|-----------|-----------|
| 1.C  | -0.091594 | 2.147147  | 0.000000  |
| 2.C  | -0.066488 | 0.037165  | -1.152060 |
| 3.C  | -0.083285 | 1.434315  | -1.201841 |
| 4.H  | -0.090633 | 1.946108  | 2.161130  |
| 5.H  | -0.061715 | -0.552962 | 2.067905  |
| 6.C  | -0.066488 | 0.037165  | 1.152060  |
| 7.H  | -0.061715 | -0.552962 | -2.067905 |
| 8.C  | -0.083285 | 1.434315  | 1.201841  |
| 9.H  | -0.090633 | 1.946108  | -2.161130 |
| 10.H | -0.105100 | 3.234629  | 0.000000  |
| 11.N | -0.057144 | -0.658292 | 0.000000  |
| 12.O | -0.009871 | -3.753823 | 0.000000  |

|      |           |           |          |
|------|-----------|-----------|----------|
| 13.H | -0.078632 | -2.773973 | 0.000000 |
| 14.H | 0.946582  | -3.924942 | 0.000000 |

**HOH- NC<sub>5</sub>H<sub>5</sub> (16)**

-1899.25 kcal mol<sup>-1</sup>

|      |           |           |           |
|------|-----------|-----------|-----------|
| 1.C  | -0.086175 | 2.133735  | 0.000000  |
| 2.C  | -0.068937 | 0.023896  | -1.152332 |
| 3.C  | -0.080499 | 1.421008  | -1.201941 |
| 4.H  | -0.085990 | 1.932922  | 2.161155  |
| 5.H  | -0.066403 | -0.566818 | 2.067758  |
| 6.C  | -0.068937 | 0.023896  | 1.152332  |
| 7.H  | -0.066403 | -0.566818 | -2.067758 |
| 8.C  | -0.080499 | 1.421008  | 1.201941  |
| 9.H  | -0.085990 | 1.932922  | -2.161155 |
| 10.H | -0.095693 | 3.221251  | 0.000000  |
| 11.N | -0.062222 | -0.671124 | 0.000000  |
| 12.O | -0.013103 | -3.705315 | 0.000000  |
| 13.H | -0.082331 | -2.723657 | 0.000000  |
| 14.H | 0.943181  | -3.876906 | 0.000000  |

**HOH- NC<sub>5</sub>H<sub>5</sub> (17)**

-1899.42 kcal mol<sup>-1</sup>

|     |           |           |           |
|-----|-----------|-----------|-----------|
| 1.C | -0.070060 | 2.120404  | 0.000000  |
| 2.C | -0.074927 | 0.010749  | -1.152626 |
| 3.C | -0.071917 | 1.407811  | -1.202059 |
| 4.H | -0.072082 | 1.919869  | 2.161186  |
| 5.H | -0.078516 | -0.580612 | 2.067583  |
| 6.C | -0.074927 | 0.010749  | 1.152626  |

|      |           |           |           |
|------|-----------|-----------|-----------|
| 7.H  | -0.078516 | -0.580612 | -2.067583 |
| 8.C  | -0.071917 | 1.407811  | 1.202059  |
| 9.H  | -0.072082 | 1.919869  | -2.161186 |
| 10.H | -0.068098 | 3.207951  | 0.000000  |
| 11.N | -0.075413 | -0.683776 | 0.000000  |
| 12.O | -0.026107 | -3.657052 | 0.000000  |
| 13.H | -0.095287 | -2.673151 | 0.000000  |
| 14.H | 0.929850  | -3.830008 | 0.000000  |

**HOH- NC<sub>5</sub>H<sub>5</sub> (18)**

-1899.51 kcal mol<sup>-1</sup>

|      |           |           |           |
|------|-----------|-----------|-----------|
| 1.C  | -0.064463 | 2.106818  | 0.000000  |
| 2.C  | -0.079526 | -0.002514 | -1.152945 |
| 3.C  | -0.069769 | 1.394405  | -1.202189 |
| 4.H  | -0.067501 | 1.906586  | 2.161222  |
| 5.H  | -0.085933 | -0.594576 | 2.067385  |
| 6.C  | -0.079526 | -0.002514 | 1.152945  |
| 7.H  | -0.085933 | -0.594576 | -2.067385 |
| 8.C  | -0.069769 | 1.394405  | 1.202189  |
| 9.H  | -0.067501 | 1.906586  | -2.161222 |
| 10.H | -0.057265 | 3.194335  | 0.000000  |
| 11.N | -0.083342 | -0.696473 | 0.000000  |
| 12.O | -0.024429 | -3.609167 | 0.000000  |
| 13.H | -0.096764 | -2.622742 | 0.000000  |
| 14.H | 0.931720  | -3.780574 | 0.000000  |

**HOH- NC<sub>5</sub>H<sub>5</sub> (19)**

-1899.48 kcal mol<sup>-1</sup>

|      |           |           |           |
|------|-----------|-----------|-----------|
| 1.C  | -0.050389 | 2.093404  | 0.000000  |
| 2.C  | -0.085092 | -0.015400 | -1.153287 |
| 3.C  | -0.062347 | 1.381246  | -1.202330 |
| 4.H  | -0.055350 | 1.893524  | 2.161260  |
| 5.H  | -0.096927 | -0.608196 | 2.067150  |
| 6.C  | -0.085092 | -0.015400 | 1.153287  |
| 7.H  | -0.096927 | -0.608196 | -2.067150 |
| 8.C  | -0.062347 | 1.381246  | 1.202330  |
| 9.H  | -0.055350 | 1.893524  | -2.161260 |
| 10.H | -0.033037 | 3.180799  | 0.000000  |
| 11.N | -0.095379 | -0.708699 | 0.000000  |
| 12.O | -0.034895 | -3.561586 | 0.000000  |
| 13.H | -0.107769 | -2.571816 | 0.000000  |
| 14.H | 0.920903  | -3.734449 | 0.000000  |

**HOH- NC<sub>5</sub>H<sub>5</sub> (20)**

-1899.47 kcal mol<sup>-1</sup>

|      |           |           |           |
|------|-----------|-----------|-----------|
| 1.C  | -0.138898 | 2.088873  | 0.000000  |
| 2.C  | -0.023328 | -0.016713 | -1.153631 |
| 3.C  | -0.100254 | 1.377848  | -1.202459 |
| 4.H  | -0.130495 | 1.889402  | 2.161300  |
| 5.H  | 0.005214  | -0.609797 | 2.066854  |
| 6.C  | -0.023328 | -0.016713 | 1.153631  |
| 7.H  | 0.005214  | -0.609797 | -2.066854 |
| 8.C  | -0.100254 | 1.377848  | 1.202459  |
| 9.H  | -0.130495 | 1.889402  | -2.161300 |
| 10.H | -0.199196 | 3.174716  | 0.000000  |
| 11.N | 0.016778  | -0.708184 | 0.000000  |
| 12.O | -0.058027 | -3.501598 | 0.000000  |

|      |          |           |          |
|------|----------|-----------|----------|
| 13.H | 0.020075 | -2.508181 | 0.000000 |
| 14.H | 0.856995 | -3.827106 | 0.000000 |

## SI 7 | Cartesian coordinates of constrained angle complexes

Cartesian coordinates (Å), single point total bonding energies (kcal mol<sup>-1</sup>) and overlap coefficients  $S^2$  (a.u.) of the halogen bond complex Pyridine-Bromobenzene were computed at the BLYP-D3(BJ)/TZ2P level of theory, changing the N-Br-C<sub>Ar</sub> angle  $\theta$  from 180° to 90°. Zenith and azimuthal angle transits are considered, along with transverse and coplanar orientation of the pyridine towards the phenyl ring.

### TRANSVERSE – zenith

N-Br = 2.986 Å

| $\theta$ (deg) | $S^2$ (a.u.) <HOMO HOMO> |
|----------------|--------------------------|
| 180            | 0.00000961               |
| 170            | 0.00017956               |
| 160            | 0.00087025               |
| 150            | 0.00198025               |
| 140            | 0.00332929               |
| 130            | 0.00473344               |
| 120            | 0.00595984               |
| 110            | 0.00680625               |
| 100            | 0.00710649               |
| 90             | 0.00667489               |

### $\theta = 180^\circ$

(-3.43 kcal mol<sup>-1</sup>)

|     |           |          |           |
|-----|-----------|----------|-----------|
| 1.C | -0.775880 | 1.680653 | -1.583842 |
| 2.C | -2.106787 | 1.663188 | -2.010121 |
| 3.C | -2.563379 | 2.671992 | -2.866275 |

|       |           |           |           |
|-------|-----------|-----------|-----------|
| 4.C   | -1.698432 | 3.686525  | -3.291230 |
| 5.C   | -0.368541 | 3.690211  | -2.855997 |
| 6.C   | 0.100189  | 2.687042  | -1.999774 |
| 7.H   | -2.775080 | 0.873955  | -1.678058 |
| 8.H   | -3.599009 | 2.660950  | -3.199679 |
| 9.H   | -2.057887 | 4.468068  | -3.956300 |
| 10.H  | 0.311221  | 4.474990  | -3.181331 |
| 11.H  | 1.131761  | 2.686441  | -1.659685 |
| 12.Br | -0.135362 | 0.288056  | -0.395351 |
| 13.H  | 2.070212  | -4.505878 | 4.013283  |
| 14.C  | 1.729570  | -3.765611 | 3.292920  |
| 15.C  | 1.165625  | -2.560638 | 3.720837  |
| 16.C  | 0.742366  | -1.639951 | 2.756587  |
| 17.N  | 0.850603  | -1.855476 | 1.434043  |
| 18.C  | 1.394370  | -3.017477 | 1.032583  |
| 19.C  | 1.846707  | -3.999599 | 1.920113  |
| 20.H  | 1.054096  | -2.334688 | 4.778790  |
| 21.H  | 0.297725  | -0.689347 | 3.051022  |
| 22.H  | 1.469122  | -3.164243 | -0.044869 |
| 23.H  | 2.278944  | -4.922498 | 1.540414  |

**$\theta = 170^\circ$**

(-3.24 kcal mol<sup>-1</sup>)

|     |           |          |           |
|-----|-----------|----------|-----------|
| 1.C | -0.775880 | 1.680653 | -1.583842 |
| 2.C | -2.106787 | 1.663188 | -2.010121 |
| 3.C | -2.563379 | 2.671992 | -2.866275 |
| 4.C | -1.698432 | 3.686525 | -3.291230 |
| 5.C | -0.368541 | 3.690211 | -2.855997 |
| 6.C | 0.100189  | 2.687042 | -1.999774 |
| 7.H | -2.775080 | 0.873955 | -1.678058 |

|       |           |           |           |
|-------|-----------|-----------|-----------|
| 8.H   | -3.599009 | 2.660950  | -3.199679 |
| 9.H   | -2.057887 | 4.468068  | -3.956300 |
| 10.H  | 0.311221  | 4.474990  | -3.181331 |
| 11.H  | 1.131761  | 2.686441  | -1.659685 |
| 12.Br | -0.135362 | 0.288056  | -0.395351 |
| 13.H  | 1.756846  | -3.719688 | 4.862020  |
| 14.C  | 1.467340  | -3.107122 | 4.011194  |
| 15.C  | 0.875650  | -1.855453 | 4.201806  |
| 16.C  | 0.520726  | -1.104459 | 3.076361  |
| 17.N  | 0.720325  | -1.526517 | 1.815681  |
| 18.C  | 1.290072  | -2.731769 | 1.642888  |
| 19.C  | 1.679295  | -3.555313 | 2.704568  |
| 20.H  | 0.691121  | -1.465238 | 5.200024  |
| 21.H  | 0.057189  | -0.123879 | 3.184258  |
| 22.H  | 1.439301  | -3.047306 | 0.610320  |
| 23.H  | 2.136385  | -4.522240 | 2.507432  |

**$\theta = 160^\circ$**

(-2.55 kcal mol<sup>-1</sup>)

|      |           |          |           |
|------|-----------|----------|-----------|
| 1.C  | -0.775880 | 1.680653 | -1.583842 |
| 2.C  | -2.106787 | 1.663188 | -2.010121 |
| 3.C  | -2.563379 | 2.671992 | -2.866275 |
| 4.C  | -1.698432 | 3.686525 | -3.291230 |
| 5.C  | -0.368541 | 3.690211 | -2.855997 |
| 6.C  | 0.100189  | 2.687042 | -1.999774 |
| 7.H  | -2.775080 | 0.873955 | -1.678058 |
| 8.H  | -3.599009 | 2.660950 | -3.199679 |
| 9.H  | -2.057887 | 4.468068 | -3.956300 |
| 10.H | 0.311221  | 4.474990 | -3.181331 |
| 11.H | 1.131761  | 2.686441 | -1.659685 |



|       |           |           |           |
|-------|-----------|-----------|-----------|
| 12.Br | -0.135362 | 0.288056  | -0.395351 |
| 13.H  | 1.385745  | -2.811830 | 5.551022  |
| 14.C  | 1.156238  | -2.345549 | 4.595583  |
| 15.C  | 0.553351  | -1.085833 | 4.543144  |
| 16.C  | 0.277697  | -0.527285 | 3.290695  |
| 17.N  | 0.564050  | -1.142424 | 2.130137  |
| 18.C  | 1.143833  | -2.353712 | 2.191219  |
| 19.C  | 1.458092  | -2.993665 | 3.394790  |
| 20.H  | 0.300221  | -0.543734 | 5.451334  |
| 21.H  | -0.191740 | 0.453006  | 3.208811  |
| 22.H  | 1.364168  | -2.827929 | 1.234871  |
| 23.H  | 1.927292  | -3.974745 | 3.386172  |

**$\theta = 150^\circ$**

(-1.45 kcal mol<sup>-1</sup>)

|       |           |           |           |
|-------|-----------|-----------|-----------|
| 1.C   | -0.775880 | 1.680653  | -1.583842 |
| 2.C   | -2.106787 | 1.663188  | -2.010121 |
| 3.C   | -2.563379 | 2.671992  | -2.866275 |
| 4.C   | -1.698432 | 3.686525  | -3.291230 |
| 5.C   | -0.368541 | 3.690211  | -2.855997 |
| 6.C   | 0.100189  | 2.687042  | -1.999774 |
| 7.H   | -2.775080 | 0.873955  | -1.678058 |
| 8.H   | -3.599009 | 2.660950  | -3.199679 |
| 9.H   | -2.057887 | 4.468068  | -3.956300 |
| 10.H  | 0.311221  | 4.474990  | -3.181331 |
| 11.H  | 1.131761  | 2.686441  | -1.659685 |
| 12.Br | -0.135362 | 0.288056  | -0.395351 |
| 13.H  | 0.968185  | -1.809887 | 6.059355  |
| 14.C  | 0.805719  | -1.504030 | 5.028331  |
| 15.C  | 0.208521  | -0.275163 | 4.734479  |

|      |           |           |          |
|------|-----------|-----------|----------|
| 16.C | 0.020663  | 0.074033  | 3.393077 |
| 17.N | 0.386525  | -0.714865 | 2.367858 |
| 18.C | 0.960097  | -1.894793 | 2.660915 |
| 19.C | 1.189818  | -2.331721 | 3.969809 |
| 20.H | -0.106729 | 0.401826  | 5.525086 |
| 21.H | -0.441496 | 1.023779  | 3.123934 |
| 22.H | 1.246003  | -2.512779 | 1.809809 |
| 23.H | 1.658018  | -3.296649 | 4.149933 |

**$\theta = 140^\circ$**

(-0.12 kcal mol<sup>-1</sup>)

|       |           |           |           |
|-------|-----------|-----------|-----------|
| 1.C   | -0.775880 | 1.680653  | -1.583842 |
| 2.C   | -2.106787 | 1.663188  | -2.010121 |
| 3.C   | -2.563379 | 2.671992  | -2.866275 |
| 4.C   | -1.698432 | 3.686525  | -3.291230 |
| 5.C   | -0.368541 | 3.690211  | -2.855997 |
| 6.C   | 0.100189  | 2.687042  | -1.999774 |
| 7.H   | -2.775080 | 0.873955  | -1.678058 |
| 8.H   | -3.599009 | 2.660950  | -3.199679 |
| 9.H   | -2.057887 | 4.468068  | -3.956300 |
| 10.H  | 0.311221  | 4.474990  | -3.181331 |
| 11.H  | 1.131761  | 2.686441  | -1.659685 |
| 12.Br | -0.135362 | 0.288056  | -0.395351 |
| 13.H  | 0.516852  | -0.744305 | 6.371573  |
| 14.C  | 0.426431  | -0.608135 | 5.296289  |
| 15.C  | -0.148361 | 0.551925  | 4.769998  |
| 16.C  | -0.242566 | 0.681225  | 3.380395  |
| 17.N  | 0.193144  | -0.256832 | 2.521620  |
| 18.C  | 0.744446  | -1.368957 | 3.037705  |
| 19.C  | 0.882626  | -1.589594 | 4.412152  |

|      |           |           |          |
|------|-----------|-----------|----------|
| 20.H | -0.517362 | 1.342712  | 5.419038 |
| 21.H | -0.684491 | 1.571097  | 2.932206 |
| 22.H | 1.088398  | -2.111432 | 2.317663 |
| 23.H | 1.336744  | -2.508555 | 4.775510 |

**$\theta = 130^\circ$**

(1.23 kcal mol<sup>-1</sup>)

|       |           |           |           |
|-------|-----------|-----------|-----------|
| 1.C   | -0.775880 | 1.680653  | -1.583842 |
| 2.C   | -2.106787 | 1.663188  | -2.010121 |
| 3.C   | -2.563379 | 2.671992  | -2.866275 |
| 4.C   | -1.698432 | 3.686525  | -3.291230 |
| 5.C   | -0.368541 | 3.690211  | -2.855997 |
| 6.C   | 0.100189  | 2.687042  | -1.999774 |
| 7.H   | -2.775080 | 0.873955  | -1.678058 |
| 8.H   | -3.599009 | 2.660950  | -3.199679 |
| 9.H   | -2.057887 | 4.468068  | -3.956300 |
| 10.H  | 0.311221  | 4.474990  | -3.181331 |
| 11.H  | 1.131761  | 2.686441  | -1.659685 |
| 12.Br | -0.135362 | 0.288056  | -0.395351 |
| 13.H  | 0.045461  | 0.352541  | 6.478190  |
| 14.C  | 0.029901  | 0.314916  | 5.391314  |
| 15.C  | -0.506452 | 1.370302  | 4.648622  |
| 16.C  | -0.503991 | 1.275841  | 3.253036  |
| 17.N  | -0.010217 | 0.217757  | 2.586752  |
| 18.C  | 0.503433  | -0.792180 | 3.310139  |
| 19.C  | 0.545848  | -0.789833 | 4.708380  |
| 20.H  | -0.919202 | 2.250334  | 5.136412  |
| 21.H  | -0.913343 | 2.078332  | 2.639452  |
| 22.H  | 0.896141  | -1.636081 | 2.743004  |
| 23.H  | 0.973233  | -1.634410 | 5.243893  |

**$\theta = 120^\circ$**

(2.35 kcal mol<sup>-1</sup>)

|       |           |           |           |
|-------|-----------|-----------|-----------|
| 1.C   | -0.775880 | 1.680653  | -1.583842 |
| 2.C   | -2.106787 | 1.663188  | -2.010121 |
| 3.C   | -2.563379 | 2.671992  | -2.866275 |
| 4.C   | -1.698432 | 3.686525  | -3.291230 |
| 5.C   | -0.368541 | 3.690211  | -2.855997 |
| 6.C   | 0.100189  | 2.687042  | -1.999774 |
| 7.H   | -2.775080 | 0.873955  | -1.678058 |
| 8.H   | -3.599009 | 2.660950  | -3.199679 |
| 9.H   | -2.057887 | 4.468068  | -3.956300 |
| 10.H  | 0.311221  | 4.474990  | -3.181331 |
| 11.H  | 1.131761  | 2.686441  | -1.659685 |
| 12.Br | -0.135362 | 0.288056  | -0.395351 |
| 13.H  | -0.431666 | 1.447323  | 6.375965  |
| 14.C  | -0.371825 | 1.237075  | 5.310521  |
| 15.C  | -0.854872 | 2.155101  | 4.374039  |
| 16.C  | -0.755670 | 1.839814  | 3.014869  |
| 17.N  | -0.217379 | 0.694483  | 2.561274  |
| 18.C  | 0.244380  | -0.181988 | 3.469941  |
| 19.C  | 0.189718  | 0.043261  | 4.849490  |
| 20.H  | -1.300039 | 3.097115  | 4.685795  |
| 21.H  | -1.121097 | 2.530070  | 2.254568  |
| 22.H  | 0.675075  | -1.101171 | 3.072907  |
| 23.H  | 0.578530  | -0.700772 | 5.540852  |

**$\theta = 110^\circ$**

(2.99 kcal mol<sup>-1</sup>)

|     |           |          |           |
|-----|-----------|----------|-----------|
| 1.C | -0.775880 | 1.680653 | -1.583842 |
|-----|-----------|----------|-----------|

|       |           |           |           |
|-------|-----------|-----------|-----------|
| 2.C   | -2.106787 | 1.663188  | -2.010121 |
| 3.C   | -2.563379 | 2.671992  | -2.866275 |
| 4.C   | -1.698432 | 3.686525  | -3.291230 |
| 5.C   | -0.368541 | 3.690211  | -2.855997 |
| 6.C   | 0.100189  | 2.687042  | -1.999774 |
| 7.H   | -2.775080 | 0.873955  | -1.678058 |
| 8.H   | -3.599009 | 2.660950  | -3.199679 |
| 9.H   | -2.057887 | 4.468068  | -3.956300 |
| 10.H  | 0.311221  | 4.474990  | -3.181331 |
| 11.H  | 1.131761  | 2.686441  | -1.659685 |
| 12.Br | -0.135362 | 0.288056  | -0.395351 |
| 13.H  | -0.900031 | 2.506777  | 6.068005  |
| 14.C  | -0.766540 | 2.130324  | 5.056364  |
| 15.C  | -1.183035 | 2.882477  | 3.954591  |
| 16.C  | -0.989955 | 2.356009  | 2.673130  |
| 17.N  | -0.422048 | 1.158861  | 2.445960  |
| 18.C  | -0.024840 | 0.443080  | 3.512254  |
| 19.C  | -0.174944 | 0.884376  | 4.831196  |
| 20.H  | -1.648302 | 3.857327  | 4.080881  |
| 21.H  | -1.301441 | 2.912585  | 1.789249  |
| 22.H  | 0.431915  | -0.522954 | 3.297349  |
| 23.H  | 0.164627  | 0.263988  | 5.657364  |

**$\theta = 100^\circ$**

(2.99 kcal mol<sup>-1</sup>)

|     |           |          |           |
|-----|-----------|----------|-----------|
| 1.C | -0.775880 | 1.680653 | -1.583842 |
| 2.C | -2.106787 | 1.663188 | -2.010121 |
| 3.C | -2.563379 | 2.671992 | -2.866275 |
| 4.C | -1.698432 | 3.686525 | -3.291230 |
| 5.C | -0.368541 | 3.690211 | -2.855997 |

|       |           |          |           |
|-------|-----------|----------|-----------|
| 6.C   | 0.100189  | 2.687042 | -1.999774 |
| 7.H   | -2.775080 | 0.873955 | -1.678058 |
| 8.H   | -3.599009 | 2.660950 | -3.199679 |
| 9.H   | -2.057887 | 4.468068 | -3.956300 |
| 10.H  | 0.311221  | 4.474990 | -3.181331 |
| 11.H  | 1.131761  | 2.686441 | -1.659685 |
| 12.Br | -0.135362 | 0.288056 | -0.395351 |
| 13.H  | -1.345403 | 3.498712 | 5.563668  |
| 14.C  | -1.142250 | 2.967521 | 4.636565  |
| 15.C  | -1.480968 | 3.530328 | 3.403023  |
| 16.C  | -1.199727 | 2.808741 | 2.238204  |
| 17.N  | -0.618004 | 1.596780 | 2.244315  |
| 18.C  | -0.296049 | 1.064030 | 3.435794  |
| 19.C  | -0.537057 | 1.707955 | 4.654054  |
| 20.H  | -1.953409 | 4.507871 | 3.340048  |
| 21.H  | -1.448895 | 3.214256 | 1.257633  |
| 22.H  | 0.174050  | 0.081000 | 3.409510  |
| 23.H  | -0.255900 | 1.230559 | 5.589889  |

**$\theta = 90^\circ$**

(2.37 kcal mol<sup>-1</sup>)

|     |           |          |           |
|-----|-----------|----------|-----------|
| 1.C | -0.775880 | 1.680653 | -1.583842 |
| 2.C | -2.106787 | 1.663188 | -2.010121 |
| 3.C | -2.563379 | 2.671992 | -2.866275 |
| 4.C | -1.698432 | 3.686525 | -3.291230 |
| 5.C | -0.368541 | 3.690211 | -2.855997 |
| 6.C | 0.100189  | 2.687042 | -1.999774 |
| 7.H | -2.775080 | 0.873955 | -1.678058 |
| 8.H | -3.599009 | 2.660950 | -3.199679 |
| 9.H | -2.057887 | 4.468068 | -3.956300 |

|       |           |          |           |
|-------|-----------|----------|-----------|
| 10.H  | 0.311221  | 4.474990 | -3.181331 |
| 11.H  | 1.131761  | 2.686441 | -1.659685 |
| 12.Br | -0.135362 | 0.288056 | -0.395351 |
| 13.H  | -1.754251 | 4.392988 | 4.878277  |
| 14.C  | -1.487540 | 3.723229 | 4.063879  |
| 15.C  | -1.739620 | 4.078970 | 2.736095  |
| 16.C  | -1.378614 | 3.184254 | 1.723304  |
| 17.N  | -0.799294 | 1.994935 | 1.962465  |
| 18.C  | -0.561005 | 1.661996 | 3.242883  |
| 19.C  | -0.885618 | 2.488973 | 4.323445  |
| 20.H  | -2.206089 | 5.028980 | 2.485806  |
| 21.H  | -1.558979 | 3.425916 | 0.675872  |
| 22.H  | -0.090684 | 0.692342 | 3.405982  |
| 23.H  | -0.670273 | 2.169570 | 5.340476  |

### TRANSVERSE – azimuth

| $\theta$ (deg) | $S^2$ (a.u.) $\langle \text{HOMO}   \text{HOMO}-2 \rangle$ |
|----------------|------------------------------------------------------------|
| 180            | 0.00000001                                                 |
| 170            | 0.00051076                                                 |
| 160            | 0.00197136                                                 |
| 150            | 0.00418609                                                 |
| 140            | 0.00687241                                                 |
| 130            | 0.00968256                                                 |
| 120            | 0.01225449                                                 |
| 110            | 0.01425636                                                 |
| 100            | 0.015376                                                   |

90

0.015376

 **$\theta = 180^\circ$** (-3.42 kcal mol<sup>-1</sup>)

|       |           |           |           |
|-------|-----------|-----------|-----------|
| 1.C   | -0.762410 | 1.646131  | -1.630075 |
| 2.C   | -2.099016 | 1.640540  | -2.038469 |
| 3.C   | -2.545788 | 2.624367  | -2.928212 |
| 4.C   | -1.665499 | 3.602455  | -3.404061 |
| 5.C   | -0.330077 | 3.594656  | -2.986161 |
| 6.C   | 0.128948  | 2.616200  | -2.096726 |
| 7.H   | -2.779225 | 0.879619  | -1.666872 |
| 8.H   | -3.585822 | 2.622496  | -3.247798 |
| 9.H   | -2.017369 | 4.364699  | -4.095079 |
| 10.H  | 0.361594  | 4.351147  | -3.351001 |
| 11.H  | 1.164771  | 2.606792  | -1.769946 |
| 12.Br | -0.135362 | 0.288056  | -0.395351 |
| 13.H  | 2.019980  | -4.378171 | 4.172279  |
| 14.C  | 1.687575  | -3.658732 | 3.427382  |
| 15.C  | 1.117611  | -2.442844 | 3.814503  |
| 16.C  | 0.705426  | -1.549977 | 2.819776  |
| 17.N  | 0.829864  | -1.802347 | 1.505199  |
| 18.C  | 1.379301  | -2.974561 | 1.143075  |
| 19.C  | 1.821536  | -3.930958 | 2.063190  |
| 20.H  | 0.993085  | -2.187468 | 4.864281  |
| 21.H  | 0.256560  | -0.591970 | 3.082050  |
| 22.H  | 1.467232  | -3.151370 | 0.071143  |
| 23.H  | 2.259015  | -4.863672 | 1.714765  |

 **$\theta = 170^\circ$** (-3.16 kcal mol<sup>-1</sup>)



|       |           |           |           |
|-------|-----------|-----------|-----------|
| 1.C   | -0.762410 | 1.646131  | -1.630075 |
| 2.C   | -2.099016 | 1.640540  | -2.038469 |
| 3.C   | -2.545788 | 2.624367  | -2.928212 |
| 4.C   | -1.665499 | 3.602455  | -3.404061 |
| 5.C   | -0.330077 | 3.594656  | -2.986161 |
| 6.C   | 0.128948  | 2.616200  | -2.096726 |
| 7.H   | -2.779225 | 0.879619  | -1.666872 |
| 8.H   | -3.585822 | 2.622496  | -3.247798 |
| 9.H   | -2.017369 | 4.364699  | -4.095079 |
| 10.H  | 0.361594  | 4.351147  | -3.351001 |
| 11.H  | 1.164771  | 2.606792  | -1.769946 |
| 12.Br | -0.135362 | 0.288056  | -0.395351 |
| 13.H  | 3.079265  | -3.826931 | 4.078514  |
| 14.C  | 2.579487  | -3.194464 | 3.348334  |
| 15.C  | 1.890934  | -2.046933 | 3.751043  |
| 16.C  | 1.264014  | -1.265359 | 2.774977  |
| 17.N  | 1.289885  | -1.562498 | 1.464127  |
| 18.C  | 1.954757  | -2.668280 | 1.086913  |
| 19.C  | 2.612495  | -3.512410 | 1.987859  |
| 20.H  | 1.838158  | -1.759651 | 4.798631  |
| 21.H  | 0.717445  | -0.363253 | 3.049774  |
| 22.H  | 1.958566  | -2.883665 | 0.018444  |
| 23.H  | 3.135807  | -4.395145 | 1.627767  |

$\theta = 160^\circ$

(-2.40 kcal mol<sup>-1</sup>)

|     |           |          |           |
|-----|-----------|----------|-----------|
| 1.C | -0.762410 | 1.646131 | -1.630075 |
| 2.C | -2.099016 | 1.640540 | -2.038469 |
| 3.C | -2.545788 | 2.624367 | -2.928212 |
| 4.C | -1.665499 | 3.602455 | -3.404061 |

|       |           |           |           |
|-------|-----------|-----------|-----------|
| 5.C   | -0.330077 | 3.594656  | -2.986161 |
| 6.C   | 0.128948  | 2.616200  | -2.096726 |
| 7.H   | -2.779225 | 0.879619  | -1.666872 |
| 8.H   | -3.585822 | 2.622496  | -3.247798 |
| 9.H   | -2.017369 | 4.364699  | -4.095079 |
| 10.H  | 0.361594  | 4.351147  | -3.351001 |
| 11.H  | 1.164771  | 2.606792  | -1.769946 |
| 12.Br | -0.135362 | 0.288056  | -0.395351 |
| 13.H  | 4.039057  | -3.146165 | 3.854680  |
| 14.C  | 3.387597  | -2.621141 | 3.159766  |
| 15.C  | 2.593005  | -1.556156 | 3.592821  |
| 16.C  | 1.771425  | -0.912154 | 2.661771  |
| 17.N  | 1.706599  | -1.266421 | 1.366556  |
| 18.C  | 2.474714  | -2.291955 | 0.959887  |
| 19.C  | 3.327689  | -2.997473 | 1.815200  |
| 20.H  | 2.606395  | -1.227941 | 4.629572  |
| 21.H  | 1.137404  | -0.077658 | 2.961238  |
| 22.H  | 2.401199  | -2.556445 | -0.094945 |
| 23.H  | 3.927644  | -3.819983 | 1.432743  |

**$\theta = 150^\circ$**

(-1.25 kcal mol<sup>-1</sup>)

|     |           |          |           |
|-----|-----------|----------|-----------|
| 1.C | -0.762410 | 1.646131 | -1.630075 |
| 2.C | -2.099016 | 1.640540 | -2.038469 |
| 3.C | -2.545788 | 2.624367 | -2.928212 |
| 4.C | -1.665499 | 3.602455 | -3.404061 |
| 5.C | -0.330077 | 3.594656 | -2.986161 |
| 6.C | 0.128948  | 2.616200 | -2.096726 |
| 7.H | -2.779225 | 0.879619 | -1.666872 |
| 8.H | -3.585822 | 2.622496 | -3.247798 |

|       |           |           |           |
|-------|-----------|-----------|-----------|
| 9.H   | -2.017369 | 4.364699  | -4.095079 |
| 10.H  | 0.361594  | 4.351147  | -3.351001 |
| 11.H  | 1.164771  | 2.606792  | -1.769946 |
| 12.Br | -0.135362 | 0.288056  | -0.395351 |
| 13.H  | 4.870191  | -2.356558 | 3.507579  |
| 14.C  | 4.087353  | -1.956185 | 2.867406  |
| 15.C  | 3.202495  | -0.985426 | 3.344647  |
| 16.C  | 2.212240  | -0.501094 | 2.483597  |
| 17.N  | 2.067347  | -0.923112 | 1.215451  |
| 18.C  | 2.923374  | -1.857020 | 0.765858  |
| 19.C  | 3.945385  | -2.401792 | 1.550458  |
| 20.H  | 3.274454  | -0.608492 | 4.362241  |
| 21.H  | 1.503676  | 0.256137  | 2.819133  |
| 22.H  | 2.781681  | -2.179654 | -0.265578 |
| 23.H  | 4.610465  | -3.155661 | 1.135618  |

$\theta = 140^\circ$

(0.11 kcal mol<sup>-1</sup>)

|       |           |          |           |
|-------|-----------|----------|-----------|
| 1.C   | -0.762410 | 1.646131 | -1.630075 |
| 2.C   | -2.099016 | 1.640540 | -2.038469 |
| 3.C   | -2.545788 | 2.624367 | -2.928212 |
| 4.C   | -1.665499 | 3.602455 | -3.404061 |
| 5.C   | -0.330077 | 3.594656 | -2.986161 |
| 6.C   | 0.128948  | 2.616200 | -2.096726 |
| 7.H   | -2.779225 | 0.879619 | -1.666872 |
| 8.H   | -3.585822 | 2.622496 | -3.247798 |
| 9.H   | -2.017369 | 4.364699 | -4.095079 |
| 10.H  | 0.361594  | 4.351147 | -3.351001 |
| 11.H  | 1.164771  | 2.606792 | -1.769946 |
| 12.Br | -0.135362 | 0.288056 | -0.395351 |

|      |          |           |           |
|------|----------|-----------|-----------|
| 13.H | 5.547416 | -1.482102 | 3.047756  |
| 14.C | 4.657493 | -1.219800 | 2.480138  |
| 15.C | 3.700882 | -0.352084 | 3.014059  |
| 16.C | 2.573066 | -0.044668 | 2.245869  |
| 17.N | 2.361167 | -0.543002 | 1.015402  |
| 18.C | 3.287104 | -1.376690 | 0.510720  |
| 19.C | 4.446817 | -1.743467 | 1.201678  |
| 20.H | 3.822036 | 0.079874  | 4.004761  |
| 21.H | 1.805132 | 0.627991  | 2.627776  |
| 22.H | 3.088450 | -1.764741 | -0.488271 |
| 23.H | 5.163524 | -2.422365 | 0.745420  |

**$\theta = 130^\circ$**

(1.43 kcal mol<sup>-1</sup>)

|       |           |           |           |
|-------|-----------|-----------|-----------|
| 1.C   | -0.762410 | 1.646131  | -1.630075 |
| 2.C   | -2.099016 | 1.640540  | -2.038469 |
| 3.C   | -2.545788 | 2.624367  | -2.928212 |
| 4.C   | -1.665499 | 3.602455  | -3.404061 |
| 5.C   | -0.330077 | 3.594656  | -2.986161 |
| 6.C   | 0.128948  | 2.616200  | -2.096726 |
| 7.H   | -2.779225 | 0.879619  | -1.666872 |
| 8.H   | -3.585822 | 2.622496  | -3.247798 |
| 9.H   | -2.017369 | 4.364699  | -4.095079 |
| 10.H  | 0.361594  | 4.351147  | -3.351001 |
| 11.H  | 1.164771  | 2.606792  | -1.769946 |
| 12.Br | -0.135362 | 0.288056  | -0.395351 |
| 13.H  | 6.050153  | -0.549366 | 2.489184  |
| 14.C  | 5.080693  | -0.434359 | 2.009730  |
| 15.C  | 4.073025  | 0.324627  | 2.611104  |
| 16.C  | 2.842940  | 0.443255  | 1.955810  |

|      |          |           |           |
|------|----------|-----------|-----------|
| 17.N | 2.579131 | -0.137641 | 0.772488  |
| 18.C | 3.554854 | -0.865561 | 0.202227  |
| 19.C | 4.816748 | -1.042501 | 0.779457  |
| 20.H | 4.232504 | 0.816241  | 3.567994  |
| 21.H | 2.032613 | 1.026605  | 2.392982  |
| 22.H | 3.312187 | -1.324311 | -0.756257 |
| 23.H | 5.570015 | -1.642375 | 0.274004  |

**$\theta = 120^\circ$**

(2.47 kcal mol<sup>-1</sup>)

|       |           |           |           |
|-------|-----------|-----------|-----------|
| 1.C   | -0.762410 | 1.646131  | -1.630075 |
| 2.C   | -2.099016 | 1.640540  | -2.038469 |
| 3.C   | -2.545788 | 2.624367  | -2.928212 |
| 4.C   | -1.665499 | 3.602455  | -3.404061 |
| 5.C   | -0.330077 | 3.594656  | -2.986161 |
| 6.C   | 0.128948  | 2.616200  | -2.096726 |
| 7.H   | -2.779225 | 0.879619  | -1.666872 |
| 8.H   | -3.585822 | 2.622496  | -3.247798 |
| 9.H   | -2.017369 | 4.364699  | -4.095079 |
| 10.H  | 0.361594  | 4.351147  | -3.351001 |
| 11.H  | 1.164771  | 2.606792  | -1.769946 |
| 12.Br | -0.135362 | 0.288056  | -0.395351 |
| 13.H  | 6.363127  | 0.413308  | 1.848834  |
| 14.C  | 5.344095  | 0.376270  | 1.470473  |
| 15.C  | 4.307615  | 1.024144  | 2.148024  |
| 16.C  | 3.013662  | 0.947850  | 1.622235  |
| 17.N  | 2.714616  | 0.280654  | 0.494090  |
| 18.C  | 3.718486  | -0.339161 | -0.150250 |
| 19.C  | 5.043939  | -0.320192 | 0.296624  |
| 20.H  | 4.493384  | 1.578235  | 3.065210  |

|      |          |           |           |
|------|----------|-----------|-----------|
| 21.H | 2.179207 | 1.439866  | 2.121884  |
| 22.H | 3.446093 | -0.871747 | -1.061394 |
| 23.H | 5.817588 | -0.839391 | -0.264304 |

$\theta = 110^\circ$

(2.90 kcal mol<sup>-1</sup>)

|       |           |           |           |
|-------|-----------|-----------|-----------|
| 1.C   | -0.762410 | 1.646131  | -1.630075 |
| 2.C   | -2.099016 | 1.640540  | -2.038469 |
| 3.C   | -2.545788 | 2.624367  | -2.928212 |
| 4.C   | -1.665499 | 3.602455  | -3.404061 |
| 5.C   | -0.330077 | 3.594656  | -2.986161 |
| 6.C   | 0.128948  | 2.616200  | -2.096726 |
| 7.H   | -2.779225 | 0.879619  | -1.666872 |
| 8.H   | -3.585822 | 2.622496  | -3.247798 |
| 9.H   | -2.017369 | 4.364699  | -4.095079 |
| 10.H  | 0.361594  | 4.351147  | -3.351001 |
| 11.H  | 1.164771  | 2.606792  | -1.769946 |
| 12.Br | -0.135362 | 0.288056  | -0.395351 |
| 13.H  | 6.476828  | 1.376672  | 1.146164  |
| 14.C  | 5.439695  | 1.187460  | 0.878753  |
| 15.C  | 4.397525  | 1.725214  | 1.638890  |
| 16.C  | 3.080044  | 1.453785  | 1.255277  |
| 17.N  | 2.763507  | 0.699175  | 0.188667  |
| 18.C  | 3.773030  | 0.186514  | -0.535999 |
| 19.C  | 5.121486  | 0.401513  | -0.232149 |
| 20.H  | 4.596751  | 2.342703  | 2.511686  |
| 21.H  | 2.240459  | 1.855219  | 1.822721  |
| 22.H  | 3.486098  | -0.420800 | -1.394411 |
| 23.H  | 5.898721  | -0.037812 | -0.853149 |

**$\theta = 100^\circ$**

(2.90 kcal mol<sup>-1</sup>)

|       |           |          |           |
|-------|-----------|----------|-----------|
| 1.C   | -0.762410 | 1.646131 | -1.630075 |
| 2.C   | -2.099016 | 1.640540 | -2.038469 |
| 3.C   | -2.545788 | 2.624367 | -2.928212 |
| 4.C   | -1.665499 | 3.602455 | -3.404061 |
| 5.C   | -0.330077 | 3.594656 | -2.986161 |
| 6.C   | 0.128948  | 2.616200 | -2.096726 |
| 7.H   | -2.779225 | 0.879619 | -1.666872 |
| 8.H   | -3.585822 | 2.622496 | -3.247798 |
| 9.H   | -2.017369 | 4.364699 | -4.095079 |
| 10.H  | 0.361594  | 4.351147 | -3.351001 |
| 11.H  | 1.164771  | 2.606792 | -1.769946 |
| 12.Br | -0.135362 | 0.288056 | -0.395351 |
| 13.H  | 6.387803  | 2.311452 | 0.402522  |
| 14.C  | 5.364588  | 1.974560 | 0.252549  |
| 15.C  | 4.340023  | 2.406535 | 1.099172  |
| 16.C  | 3.040069  | 1.945687 | 0.866087  |
| 17.N  | 2.724317  | 1.105204 | -0.134501 |
| 18.C  | 3.716828  | 0.695492 | -0.943301 |
| 19.C  | 5.047032  | 1.100685 | -0.790798 |
| 20.H  | 4.539463  | 3.086418 | 1.924241  |
| 21.H  | 2.214508  | 2.260043 | 1.504582  |
| 22.H  | 3.430989  | 0.014828 | -1.745188 |
| 23.H  | 5.810948  | 0.738008 | -1.474640 |

**$\theta = 90^\circ$**

(3.07 kcal mol<sup>-1</sup>)

|     |           |          |           |
|-----|-----------|----------|-----------|
| 1.C | -0.762410 | 1.646131 | -1.630075 |
| 2.C | -2.099016 | 1.640540 | -2.038469 |

|       |           |          |           |
|-------|-----------|----------|-----------|
| 3.C   | -2.545788 | 2.624367 | -2.928212 |
| 4.C   | -1.665499 | 3.602455 | -3.404061 |
| 5.C   | -0.330077 | 3.594656 | -2.986161 |
| 6.C   | 0.128948  | 2.616200 | -2.096726 |
| 7.H   | -2.779225 | 0.879619 | -1.666872 |
| 8.H   | -3.585822 | 2.622496 | -3.247798 |
| 9.H   | -2.017369 | 4.364699 | -4.095079 |
| 10.H  | 0.361594  | 4.351147 | -3.351001 |
| 11.H  | 1.164771  | 2.606792 | -1.769946 |
| 12.Br | -0.135362 | 0.288056 | -0.395351 |
| 13.H  | 6.098755  | 3.189247 | -0.359496 |
| 14.C  | 5.121058  | 2.713657 | -0.389112 |
| 15.C  | 4.136856  | 3.047406 | 0.545268  |
| 16.C  | 2.894953  | 2.408611 | 0.466490  |
| 17.N  | 2.598237  | 1.486404 | -0.465595 |
| 18.C  | 3.551588  | 1.172308 | -1.359779 |
| 19.C  | 4.822841  | 1.756081 | -1.362347 |
| 20.H  | 4.323263  | 3.786782 | 1.320724  |
| 21.H  | 2.102144  | 2.642038 | 1.177133  |
| 22.H  | 3.282439  | 0.421900 | -2.103068 |
| 23.H  | 5.556937  | 1.464496 | -2.109893 |

**COPLANAR – zenith**

N-Br = 2.983 Å

| $\theta$ (deg) | $S^2$ (a.u.) <HOMO HOMO> |
|----------------|--------------------------|
| 180            | 0.00000036               |
| 170            | 0.00023409               |
| 160            | 0.00094249               |
| 150            | 0.00200704               |



|     |            |
|-----|------------|
| 140 | 0.003249   |
| 130 | 0.003249   |
| 120 | 0.00544644 |
| 110 | 0.00594441 |
| 100 | 0.00585225 |
| 90  | 0.00505521 |

**$\theta = 180^\circ$**

(-3.38 kcal mol<sup>-1</sup>)

|       |           |           |           |
|-------|-----------|-----------|-----------|
| 1.C   | -3.034465 | 13.112654 | -0.857302 |
| 2.C   | -3.561600 | 14.091411 | -0.010255 |
| 3.C   | -4.015813 | 15.296835 | -0.557694 |
| 4.C   | -3.943780 | 15.520733 | -1.937054 |
| 5.C   | -3.413617 | 14.531178 | -2.772301 |
| 6.C   | -2.956010 | 13.321599 | -2.236958 |
| 7.H   | -3.615931 | 13.914144 | 1.060011  |
| 8.H   | -4.426560 | 16.060433 | 0.099596  |
| 9.H   | -4.297910 | 16.458812 | -2.357670 |
| 10.H  | -3.353526 | 14.696373 | -3.846036 |
| 11.H  | -2.543530 | 12.551348 | -2.882247 |
| 12.Br | -2.400426 | 11.440722 | -0.106299 |
| 13.H  | -0.043535 | 5.535973  | 2.512974  |
| 14.C  | -0.429372 | 6.467018  | 2.104043  |
| 15.C  | -0.462412 | 6.680119  | 0.723255  |
| 16.C  | -0.967683 | 7.893672  | 0.245202  |
| 17.N  | -1.424984 | 8.869497  | 1.048725  |
| 18.C  | -1.388944 | 8.654851  | 2.375241  |
| 19.C  | -0.902436 | 7.475183  | 2.948371  |
| 20.H  | -0.105137 | 5.924475  | 0.027497  |
| 21.H  | -1.009567 | 8.096396  | -0.824936 |

|      |           |          |          |
|------|-----------|----------|----------|
| 22.H | -1.766161 | 9.463431 | 3.001288 |
| 23.H | -0.896434 | 7.354221 | 4.029125 |

**$\theta = 170^\circ$**

(-3.14 kcal mol<sup>-1</sup>)

|       |           |           |           |
|-------|-----------|-----------|-----------|
| 1.C   | -3.034465 | 13.112654 | -0.857302 |
| 2.C   | -3.561600 | 14.091411 | -0.010255 |
| 3.C   | -4.015813 | 15.296835 | -0.557694 |
| 4.C   | -3.943780 | 15.520733 | -1.937054 |
| 5.C   | -3.413617 | 14.531178 | -2.772301 |
| 6.C   | -2.956010 | 13.321599 | -2.236958 |
| 7.H   | -3.615931 | 13.914144 | 1.060011  |
| 8.H   | -4.426560 | 16.060433 | 0.099596  |
| 9.H   | -4.297910 | 16.458812 | -2.357670 |
| 10.H  | -3.353526 | 14.696373 | -3.846036 |
| 11.H  | -2.543530 | 12.551348 | -2.882247 |
| 12.Br | -2.400426 | 11.440722 | -0.106299 |
| 13.H  | 1.042263  | 6.005706  | 2.320651  |
| 14.C  | 0.485722  | 6.860464  | 1.943038  |
| 15.C  | 0.322389  | 7.054606  | 0.568734  |
| 16.C  | -0.401489 | 8.168788  | 0.131531  |
| 17.N  | -0.950385 | 9.066088  | 0.968532  |
| 18.C  | -0.787663 | 8.870463  | 2.288483  |
| 19.C  | -0.080969 | 7.787519  | 2.821961  |
| 20.H  | 0.745380  | 6.359682  | -0.152988 |
| 21.H  | -0.550070 | 8.353759  | -0.932309 |
| 22.H  | -1.243595 | 9.613931  | 2.942249  |
| 23.H  | 0.020038  | 7.677663  | 3.899192  |

**$\theta = 160^\circ$**

(-2.43 kcal mol<sup>-1</sup>)

|       |           |           |           |
|-------|-----------|-----------|-----------|
| 1.C   | -3.034465 | 13.112654 | -0.857302 |
| 2.C   | -3.561600 | 14.091411 | -0.010255 |
| 3.C   | -4.015813 | 15.296835 | -0.557694 |
| 4.C   | -3.943780 | 15.520733 | -1.937054 |
| 5.C   | -3.413617 | 14.531178 | -2.772301 |
| 6.C   | -2.956010 | 13.321599 | -2.236958 |
| 7.H   | -3.615931 | 13.914144 | 1.060011  |
| 8.H   | -4.426560 | 16.060433 | 0.099596  |
| 9.H   | -4.297910 | 16.458812 | -2.357670 |
| 10.H  | -3.353526 | 14.696373 | -3.846036 |
| 11.H  | -2.543530 | 12.551348 | -2.882247 |
| 12.Br | -2.400426 | 11.440722 | -0.106299 |
| 13.H  | 2.023469  | 6.640188  | 2.053703  |
| 14.C  | 1.313131  | 7.392796  | 1.719130  |
| 15.C  | 1.024949  | 7.547604  | 0.360429  |
| 16.C  | 0.104435  | 8.529322  | -0.020921 |
| 17.N  | -0.519845 | 9.334833  | 0.855683  |
| 18.C  | -0.235846 | 9.178031  | 2.160205  |
| 19.C  | 0.669545  | 8.225194  | 2.638905  |
| 20.H  | 1.501194  | 6.922848  | -0.391630 |
| 21.H  | -0.145963 | 8.679891  | -1.071004 |
| 22.H  | -0.757011 | 9.844947  | 2.846964  |
| 23.H  | 0.862103  | 8.141348  | 3.705952  |

**$\theta = 150^\circ$**

(-1.33 kcal mol<sup>-1</sup>)

|     |           |           |           |
|-----|-----------|-----------|-----------|
| 1.C | -3.034465 | 13.112654 | -0.857302 |
| 2.C | -3.561600 | 14.091411 | -0.010255 |
| 3.C | -4.015813 | 15.296835 | -0.557694 |

|       |           |           |           |
|-------|-----------|-----------|-----------|
| 4.C   | -3.943780 | 15.520733 | -1.937054 |
| 5.C   | -3.413617 | 14.531178 | -2.772301 |
| 6.C   | -2.956010 | 13.321599 | -2.236958 |
| 7.H   | -3.615931 | 13.914144 | 1.060011  |
| 8.H   | -4.426560 | 16.060433 | 0.099596  |
| 9.H   | -4.297910 | 16.458812 | -2.357670 |
| 10.H  | -3.353526 | 14.696373 | -3.846036 |
| 11.H  | -2.543530 | 12.551348 | -2.882247 |
| 12.Br | -2.400426 | 11.440722 | -0.106299 |
| 13.H  | 2.870271  | 7.420139  | 1.720242  |
| 14.C  | 2.027715  | 8.047841  | 1.439122  |
| 15.C  | 1.623924  | 8.144132  | 0.104670  |
| 16.C  | 0.534716  | 8.964321  | -0.207521 |
| 17.N  | -0.146445 | 9.667564  | 0.713607  |
| 18.C  | 0.249739  | 9.568208  | 1.994304  |
| 19.C  | 1.326302  | 8.774912  | 2.404764  |
| 20.H  | 2.139339  | 7.596859  | -0.681180 |
| 21.H  | 0.190478  | 9.064883  | -1.236808 |
| 22.H  | -0.321194 | 10.149460 | 2.718327  |
| 23.H  | 1.604175  | 8.731185  | 3.455274  |

**$\theta = 140^\circ$**

(-0.02 kcal mol<sup>-1</sup>)

|     |             |             |             |
|-----|-------------|-------------|-------------|
| 1.C | -3.03446500 | 13.11265400 | -0.85730200 |
| 2.C | -3.56160000 | 14.09141100 | -0.01025500 |
| 3.C | -4.01581300 | 15.29683500 | -0.55769400 |
| 4.C | -3.94378000 | 15.52073300 | -1.93705400 |
| 5.C | -3.41361700 | 14.53117800 | -2.77230100 |
| 6.C | -2.95601000 | 13.32159900 | -2.23695800 |
| 7.H | -3.61593100 | 13.91414400 | 1.06001100  |

|       |             |             |             |
|-------|-------------|-------------|-------------|
| 8.H   | -4.42656000 | 16.06043300 | 0.09959600  |
| 9.H   | -4.29791000 | 16.45881200 | -2.35767000 |
| 10.H  | -3.35352600 | 14.69637300 | -3.84603600 |
| 11.H  | -2.54353000 | 12.55134800 | -2.88224700 |
| 12.Br | -2.40042600 | 11.44072200 | -0.10629900 |
| 13.H  | 2.86978135  | 7.41958886  | 1.72044542  |
| 14.C  | 2.02730084  | 8.04737903  | 1.43929255  |
| 15.C  | 1.62357844  | 8.14372011  | 0.10482371  |
| 16.C  | 0.53446822  | 8.96402239  | -0.20740911 |
| 17.N  | -0.14666149 | 9.66732805  | 0.71369239  |
| 18.C  | 0.24945620  | 9.56792360  | 1.99440657  |
| 19.C  | 1.32592120  | 8.77451436  | 2.40490883  |
| 20.H  | 2.13897206  | 7.59639971  | -0.68100841 |
| 21.H  | 0.19028523  | 9.06462681  | -1.23671150 |
| 22.H  | -0.32144933 | 10.14922861 | 2.71840819  |
| 23.H  | 1.60374249  | 8.73075289  | 3.45543114  |

**$\theta = 130^\circ$**

(1.25 kcal mol<sup>-1</sup>)

|      |           |           |           |
|------|-----------|-----------|-----------|
| 1.C  | -3.034465 | 13.112654 | -0.857302 |
| 2.C  | -3.561600 | 14.091411 | -0.010255 |
| 3.C  | -4.015813 | 15.296835 | -0.557694 |
| 4.C  | -3.943780 | 15.520733 | -1.937054 |
| 5.C  | -3.413617 | 14.531178 | -2.772301 |
| 6.C  | -2.956010 | 13.321599 | -2.236958 |
| 7.H  | -3.615931 | 13.914144 | 1.060011  |
| 8.H  | -4.426560 | 16.060433 | 0.099596  |
| 9.H  | -4.297910 | 16.458812 | -2.357670 |
| 10.H | -3.353526 | 14.696373 | -3.846036 |
| 11.H | -2.543530 | 12.551348 | -2.882247 |

|       |           |           |           |
|-------|-----------|-----------|-----------|
| 12.Br | -2.400426 | 11.440722 | -0.106299 |
| 13.H  | 3.556939  | 8.321862  | 1.330401  |
| 14.C  | 2.607761  | 8.805695  | 1.111523  |
| 15.C  | 2.101112  | 8.826066  | -0.190772 |
| 16.C  | 0.876281  | 9.460567  | -0.422599 |
| 17.N  | 0.158469  | 10.054172 | 0.546619  |
| 18.C  | 0.654339  | 10.029140 | 1.795821  |
| 19.C  | 1.869348  | 9.419968  | 2.126653  |
| 20.H  | 2.640426  | 8.361236  | -1.012840 |
| 21.H  | 0.449029  | 9.497036  | -1.424683 |
| 22.H  | 0.050613  | 10.518217 | 2.560246  |
| 23.H  | 2.223706  | 9.429255  | 3.154778  |

**$\theta = 120^\circ$**

(2.39 kcal mol<sup>-1</sup>)

|       |           |           |           |
|-------|-----------|-----------|-----------|
| 1.C   | -3.034465 | 13.112654 | -0.857302 |
| 2.C   | -3.561600 | 14.091411 | -0.010255 |
| 3.C   | -4.015813 | 15.296835 | -0.557694 |
| 4.C   | -3.943780 | 15.520733 | -1.937054 |
| 5.C   | -3.413617 | 14.531178 | -2.772301 |
| 6.C   | -2.956010 | 13.321599 | -2.236958 |
| 7.H   | -3.615931 | 13.914144 | 1.060011  |
| 8.H   | -4.426560 | 16.060433 | 0.099596  |
| 9.H   | -4.297910 | 16.458812 | -2.357670 |
| 10.H  | -3.353526 | 14.696373 | -3.846036 |
| 11.H  | -2.543530 | 12.551348 | -2.882247 |
| 12.Br | -2.400426 | 11.440722 | -0.106299 |
| 13.H  | 4.371916  | 10.378163 | 0.430307  |
| 14.C  | 3.298369  | 10.535298 | 0.354508  |
| 15.C  | 2.636274  | 10.361306 | -0.863868 |

|      |          |           |           |
|------|----------|-----------|-----------|
| 16.C | 1.254759 | 10.575085 | -0.911386 |
| 17.N | 0.528143 | 10.940753 | 0.158811  |
| 18.C | 1.174243 | 11.105522 | 1.326040  |
| 19.C | 2.552257 | 10.915397 | 1.473399  |
| 20.H | 3.175152 | 10.066150 | -1.761206 |
| 21.H | 0.703644 | 10.449269 | -1.843313 |
| 22.H | 0.559299 | 11.402033 | 2.175718  |
| 23.H | 3.024147 | 11.062601 | 2.442083  |

**$\theta = 110^\circ$**

(3.08 kcal mol<sup>-1</sup>)

|       |           |           |           |
|-------|-----------|-----------|-----------|
| 1.C   | -3.034465 | 13.112654 | -0.857302 |
| 2.C   | -3.561600 | 14.091411 | -0.010255 |
| 3.C   | -4.015813 | 15.296835 | -0.557694 |
| 4.C   | -3.943780 | 15.520733 | -1.937054 |
| 5.C   | -3.413617 | 14.531178 | -2.772301 |
| 6.C   | -2.956010 | 13.321599 | -2.236958 |
| 7.H   | -3.615931 | 13.914144 | 1.060011  |
| 8.H   | -4.426560 | 16.060433 | 0.099596  |
| 9.H   | -4.297910 | 16.458812 | -2.357670 |
| 10.H  | -3.353526 | 14.696373 | -3.846036 |
| 11.H  | -2.543530 | 12.551348 | -2.882247 |
| 12.Br | -2.400426 | 11.440722 | -0.106299 |
| 13.H  | 4.475462  | 11.470260 | -0.052596 |
| 14.C  | 3.387946  | 11.454494 | -0.051906 |
| 15.C  | 2.677988  | 11.167963 | -1.221069 |
| 16.C  | 1.280172  | 11.159493 | -1.170243 |
| 17.N  | 0.581670  | 11.413787 | -0.050227 |
| 18.C  | 1.273750  | 11.688267 | 1.069016  |
| 19.C  | 2.671372  | 11.720332 | 1.118106  |

|      |          |           |           |
|------|----------|-----------|-----------|
| 20.H | 3.192544 | 10.954883 | -2.155174 |
| 21.H | 0.691971 | 10.940417 | -2.061349 |
| 22.H | 0.680722 | 11.890238 | 1.960954  |
| 23.H | 3.180736 | 11.948251 | 2.051540  |

$\theta = 100^\circ$

(3.24kcal mol<sup>-1</sup>)

|       |           |           |           |
|-------|-----------|-----------|-----------|
| 1.C   | -3.034465 | 13.112654 | -0.857302 |
| 2.C   | -3.561600 | 14.091411 | -0.010255 |
| 3.C   | -4.015813 | 15.296835 | -0.557694 |
| 4.C   | -3.943780 | 15.520733 | -1.937054 |
| 5.C   | -3.413617 | 14.531178 | -2.772301 |
| 6.C   | -2.956010 | 13.321599 | -2.236958 |
| 7.H   | -3.615931 | 13.914144 | 1.060011  |
| 8.H   | -4.426560 | 16.060433 | 0.099596  |
| 9.H   | -4.297910 | 16.458812 | -2.357670 |
| 10.H  | -3.353526 | 14.696373 | -3.846036 |
| 11.H  | -2.543530 | 12.551348 | -2.882247 |
| 12.Br | -2.400426 | 11.440722 | -0.106299 |
| 13.H  | 4.370101  | 12.561069 | -0.538014 |
| 14.C  | 3.301656  | 12.372990 | -0.460608 |
| 15.C  | 2.565889  | 11.968149 | -1.577671 |
| 16.C  | 1.194219  | 11.738450 | -1.428326 |
| 17.N  | 0.544588  | 11.887641 | -0.260966 |
| 18.C  | 1.261158  | 12.277349 | 0.807525  |
| 19.C  | 2.635906  | 12.531110 | 0.757937  |
| 20.H  | 3.040877  | 11.831951 | -2.546464 |
| 21.H  | 0.587171  | 11.421739 | -2.276402 |
| 22.H  | 0.707693  | 12.389795 | 1.739759  |



23.H 3.166881 12.844382 1.653829

$\theta = 90^\circ$

(2.87 kcal mol<sup>-1</sup>)

|       |           |           |           |
|-------|-----------|-----------|-----------|
| 1.C   | -3.034465 | 13.112654 | -0.857302 |
| 2.C   | -3.561600 | 14.091411 | -0.010255 |
| 3.C   | -4.015813 | 15.296835 | -0.557694 |
| 4.C   | -3.943780 | 15.520733 | -1.937054 |
| 5.C   | -3.413617 | 14.531178 | -2.772301 |
| 6.C   | -2.956010 | 13.321599 | -2.236958 |
| 7.H   | -3.615931 | 13.914144 | 1.060011  |
| 8.H   | -4.426560 | 16.060433 | 0.099596  |
| 9.H   | -4.297910 | 16.458812 | -2.357670 |
| 10.H  | -3.353526 | 14.696373 | -3.846036 |
| 11.H  | -2.543530 | 12.551348 | -2.882247 |
| 12.Br | -2.400426 | 11.440722 | -0.106299 |
| 13.H  | 4.059035  | 13.617444 | -1.011197 |
| 14.C  | 3.042121  | 13.262879 | -0.859179 |
| 15.C  | 2.303383  | 12.737550 | -1.922840 |
| 16.C  | 0.999510  | 12.294363 | -1.677795 |
| 17.N  | 0.418024  | 12.347915 | -0.467005 |
| 18.C  | 1.136849  | 12.854871 | 0.549511  |
| 19.C  | 2.446935  | 13.323097 | 0.403835  |
| 20.H  | 2.724758  | 12.670704 | -2.923189 |
| 21.H  | 0.392429  | 11.878610 | -2.481938 |
| 22.H  | 0.639392  | 12.885524 | 1.518854  |
| 23.H  | 2.983004  | 13.723769 | 1.261034  |

**COPLANAR – azimuth**

| $\theta$ (deg) | $S^2$ (a.u.) <HOMO HOMO-2> |
|----------------|----------------------------|
| 180            | 0.00000049                 |
| 170            | 0.000484                   |
| 160            | 0.00192721                 |
| 150            | 0.00414736                 |
| 140            | 0.00685584                 |
| 130            | 0.00972196                 |
| 120            | 0.01238769                 |
| 110            | 0.01456849                 |
| 100            | 0.01600225                 |
| 90             | 0.01646089                 |

**$\theta = 180^\circ$**

(-3.38 kcal mol<sup>-1</sup>)

|       |           |           |           |
|-------|-----------|-----------|-----------|
| 1.C   | -3.026734 | 13.207519 | -0.603826 |
| 2.C   | -3.185054 | 14.184579 | 0.382893  |
| 3.C   | -3.635488 | 15.458446 | 0.017627  |
| 4.C   | -3.924561 | 15.751735 | -1.319673 |
| 5.C   | -3.761285 | 14.762978 | -2.296213 |
| 6.C   | -3.311435 | 13.485329 | -1.943614 |
| 7.H   | -2.959666 | 13.953338 | 1.419991  |
| 8.H   | -3.759506 | 16.220870 | 0.783887  |
| 9.H   | -4.274218 | 16.742836 | -1.598556 |
| 10.H  | -3.983492 | 14.981847 | -3.338579 |
| 11.H  | -3.183178 | 12.715443 | -2.699028 |
| 12.Br | -2.400426 | 11.440722 | -0.106299 |
| 13.H  | -0.072295 | 5.203333  | 1.613113  |
| 14.C  | -0.453420 | 6.186529  | 1.346635  |
| 15.C  | -0.536795 | 6.580565  | 0.008403  |
| 16.C  | -1.033729 | 7.854877  | -0.284398 |

|      |           |          |           |
|------|-----------|----------|-----------|
| 17.N | -1.436877 | 8.723590 | 0.658902  |
| 18.C | -1.352705 | 8.335136 | 1.943050  |
| 19.C | -0.869971 | 7.082171 | 2.335263  |
| 20.H | -0.224390 | 5.917519 | -0.795025 |
| 21.H | -1.113774 | 8.197767 | -1.315933 |
| 22.H | -1.686639 | 9.060182 | 2.685226  |
| 23.H | -0.823535 | 6.819513 | 3.389565  |

**$\theta = 170^\circ$**

(-3.11 kcal mol<sup>-1</sup>)

|       |           |           |           |
|-------|-----------|-----------|-----------|
| 1.C   | -3.026734 | 13.207519 | -0.603826 |
| 2.C   | -3.185054 | 14.184579 | 0.382893  |
| 3.C   | -3.635488 | 15.458446 | 0.017627  |
| 4.C   | -3.924561 | 15.751735 | -1.319673 |
| 5.C   | -3.761285 | 14.762978 | -2.296213 |
| 6.C   | -3.311435 | 13.485329 | -1.943614 |
| 7.H   | -2.959666 | 13.953338 | 1.419991  |
| 8.H   | -3.759506 | 16.220870 | 0.783887  |
| 9.H   | -4.274218 | 16.742836 | -1.598556 |
| 10.H  | -3.983492 | 14.981847 | -3.338579 |
| 11.H  | -3.183178 | 12.715443 | -2.699028 |
| 12.Br | -2.400426 | 11.440722 | -0.106299 |
| 13.H  | -0.168804 | 4.960052  | 0.443581  |
| 14.C  | -0.534468 | 5.981128  | 0.362142  |
| 15.C  | -0.672531 | 6.591821  | -0.887287 |
| 16.C  | -1.146829 | 7.906627  | -0.940886 |
| 17.N  | -1.478038 | 8.615956  | 0.151891  |
| 18.C  | -1.341689 | 8.019662  | 1.348912  |
| 19.C  | -0.876055 | 6.709813  | 1.504689  |
| 20.H  | -0.419161 | 6.064079  | -1.803810 |

|      |           |          |           |
|------|-----------|----------|-----------|
| 21.H | -1.267887 | 8.416293 | -1.896726 |
| 22.H | -1.617812 | 8.619065 | 2.216380  |
| 23.H | -0.785143 | 6.276189 | 2.497867  |

**$\theta = 160^\circ$**

(-2.30 kcal mol<sup>-1</sup>)

|       |           |           |           |
|-------|-----------|-----------|-----------|
| 1.C   | -3.026734 | 13.207519 | -0.603826 |
| 2.C   | -3.185054 | 14.184579 | 0.382893  |
| 3.C   | -3.635488 | 15.458446 | 0.017627  |
| 4.C   | -3.924561 | 15.751735 | -1.319673 |
| 5.C   | -3.761285 | 14.762978 | -2.296213 |
| 6.C   | -3.311435 | 13.485329 | -1.943614 |
| 7.H   | -2.959666 | 13.953338 | 1.419991  |
| 8.H   | -3.759506 | 16.220870 | 0.783887  |
| 9.H   | -4.274218 | 16.742836 | -1.598556 |
| 10.H  | -3.983492 | 14.981847 | -3.338579 |
| 11.H  | -3.183178 | 12.715443 | -2.699028 |
| 12.Br | -2.400426 | 11.440722 | -0.106299 |
| 13.H  | -0.329793 | 4.914733  | -0.743114 |
| 14.C  | -0.669813 | 5.942374  | -0.636908 |
| 15.C  | -0.851923 | 6.753177  | -1.760525 |
| 16.C  | -1.290664 | 8.068060  | -1.573080 |
| 17.N  | -1.547214 | 8.594158  | -0.362952 |
| 18.C  | -1.368991 | 7.806222  | 0.711484  |
| 19.C  | -0.933717 | 6.479569  | 0.625966  |
| 20.H  | -0.659218 | 6.378669  | -2.763187 |
| 21.H  | -1.444185 | 8.730534  | -2.424904 |
| 22.H  | -1.584793 | 8.259933  | 1.678750  |
| 23.H  | -0.806286 | 5.886534  | 1.528611  |

**$\theta = 150^\circ$**

(-1.07 kcal mol<sup>-1</sup>)

|       |           |           |           |
|-------|-----------|-----------|-----------|
| 1.C   | -3.026734 | 13.207519 | -0.603826 |
| 2.C   | -3.185054 | 14.184579 | 0.382893  |
| 3.C   | -3.635488 | 15.458446 | 0.017627  |
| 4.C   | -3.924561 | 15.751735 | -1.319673 |
| 5.C   | -3.761285 | 14.762978 | -2.296213 |
| 6.C   | -3.311435 | 13.485329 | -1.943614 |
| 7.H   | -2.959666 | 13.953338 | 1.419991  |
| 8.H   | -3.759506 | 16.220870 | 0.783887  |
| 9.H   | -4.274218 | 16.742836 | -1.598556 |
| 10.H  | -3.983492 | 14.981847 | -3.338579 |
| 11.H  | -3.183178 | 12.715443 | -2.699028 |
| 12.Br | -2.400426 | 11.440722 | -0.106299 |
| 13.H  | -0.550373 | 5.068742  | -1.910951 |
| 14.C  | -0.855343 | 6.071434  | -1.620190 |
| 15.C  | -1.069523 | 7.059728  | -2.584806 |
| 16.C  | -1.460867 | 8.334269  | -2.161791 |
| 17.N  | -1.642305 | 8.658855  | -0.869998 |
| 18.C  | -1.433782 | 7.701290  | 0.050114  |
| 19.C  | -1.041204 | 6.398421  | -0.274229 |
| 20.H  | -0.937273 | 6.851731  | -3.644036 |
| 21.H  | -1.637315 | 9.130947  | -2.884436 |
| 22.H  | -1.588583 | 7.993685  | 1.088657  |
| 23.H  | -0.886319 | 5.662369  | 0.511223  |

**$\theta = 140^\circ$**

(0.40 kcal mol<sup>-1</sup>)

|     |           |           |           |
|-----|-----------|-----------|-----------|
| 1.C | -3.026734 | 13.207519 | -0.603826 |
| 2.C | -3.185054 | 14.184579 | 0.382893  |

|       |           |           |           |
|-------|-----------|-----------|-----------|
| 3.C   | -3.635488 | 15.458446 | 0.017627  |
| 4.C   | -3.924561 | 15.751735 | -1.319673 |
| 5.C   | -3.761285 | 14.762978 | -2.296213 |
| 6.C   | -3.311435 | 13.485329 | -1.943614 |
| 7.H   | -2.959666 | 13.953338 | 1.419991  |
| 8.H   | -3.759506 | 16.220870 | 0.783887  |
| 9.H   | -4.274218 | 16.742836 | -1.598556 |
| 10.H  | -3.983492 | 14.981847 | -3.338579 |
| 11.H  | -3.183178 | 12.715443 | -2.699028 |
| 12.Br | -2.400426 | 11.440722 | -0.106299 |
| 13.H  | -0.823841 | 5.417402  | -3.024446 |
| 14.C  | -1.085421 | 6.364388  | -2.557828 |
| 15.C  | -1.318720 | 7.502161  | -3.335083 |
| 16.C  | -1.652267 | 8.697167  | -2.689133 |
| 17.N  | -1.760421 | 8.808080  | -1.353840 |
| 18.C  | -1.534092 | 7.708055  | -0.615100 |
| 19.C  | -1.195250 | 6.468834  | -1.168546 |
| 20.H  | -1.244877 | 7.468892  | -4.419594 |
| 21.H  | -1.841409 | 9.605366  | -3.261361 |
| 22.H  | -1.629067 | 7.828410  | 0.464031  |
| 23.H  | -1.022810 | 5.610505  | -0.523386 |

**$\theta = 130^\circ$**

(1.84 kcal mol<sup>-1</sup>)

|     |           |           |           |
|-----|-----------|-----------|-----------|
| 1.C | -3.026734 | 13.207519 | -0.603826 |
| 2.C | -3.185054 | 14.184579 | 0.382893  |
| 3.C | -3.635488 | 15.458446 | 0.017627  |
| 4.C | -3.924561 | 15.751735 | -1.319673 |
| 5.C | -3.761285 | 14.762978 | -2.296213 |
| 6.C | -3.311435 | 13.485329 | -1.943614 |

|       |           |           |           |
|-------|-----------|-----------|-----------|
| 7.H   | -2.959666 | 13.953338 | 1.419991  |
| 8.H   | -3.759506 | 16.220870 | 0.783887  |
| 9.H   | -4.274218 | 16.742836 | -1.598556 |
| 10.H  | -3.983492 | 14.981847 | -3.338579 |
| 11.H  | -3.183178 | 12.715443 | -2.699028 |
| 12.Br | -2.400426 | 11.440722 | -0.106299 |
| 13.H  | -1.141887 | 5.950116  | -4.049764 |
| 14.C  | -1.353056 | 6.812334  | -3.421331 |
| 15.C  | -1.591941 | 8.067031  | -3.988561 |
| 16.C  | -1.859048 | 9.145726  | -3.139082 |
| 17.N  | -1.897975 | 9.037300  | -1.799778 |
| 18.C  | -1.666875 | 7.826310  | -1.263946 |
| 19.C  | -1.391174 | 6.688670  | -2.029811 |
| 20.H  | -1.572684 | 8.211400  | -5.066295 |
| 21.H  | -2.050266 | 10.139376 | -3.544225 |
| 22.H  | -1.705016 | 7.769129  | -0.176149 |
| 23.H  | -1.211613 | 5.732518  | -1.543778 |

**$\theta = 120^\circ$**

(3.00 kcal mol<sup>-1</sup>)

|      |           |           |           |
|------|-----------|-----------|-----------|
| 1.C  | -3.026734 | 13.207519 | -0.603826 |
| 2.C  | -3.185054 | 14.184579 | 0.382893  |
| 3.C  | -3.635488 | 15.458446 | 0.017627  |
| 4.C  | -3.924561 | 15.751735 | -1.319673 |
| 5.C  | -3.761285 | 14.762978 | -2.296213 |
| 6.C  | -3.311435 | 13.485329 | -1.943614 |
| 7.H  | -2.959666 | 13.953338 | 1.419991  |
| 8.H  | -3.759506 | 16.220870 | 0.783887  |
| 9.H  | -4.274218 | 16.742836 | -1.598556 |
| 10.H | -3.983492 | 14.981847 | -3.338579 |

|       |           |           |           |
|-------|-----------|-----------|-----------|
| 11.H  | -3.183178 | 12.715443 | -2.699028 |
| 12.Br | -2.400426 | 11.440722 | -0.106299 |
| 13.H  | -1.494849 | 6.650700  | -4.955754 |
| 14.C  | -1.650116 | 7.401661  | -4.184463 |
| 15.C  | -1.880884 | 8.737176  | -4.525385 |
| 16.C  | -2.074928 | 9.666318  | -3.497967 |
| 17.N  | -2.050785 | 9.339549  | -2.194262 |
| 18.C  | -1.828094 | 8.052464  | -1.876711 |
| 19.C  | -1.623023 | 7.051248  | -2.831854 |
| 20.H  | -1.910733 | 9.056694  | -5.564490 |
| 21.H  | -2.257540 | 10.716752 | -3.724433 |
| 22.H  | -1.814120 | 7.817644  | -0.812431 |
| 23.H  | -1.446990 | 6.024700  | -2.518950 |

**$\theta = 110^\circ$**

(4.20 kcal mol<sup>-1</sup>)

|       |           |           |           |
|-------|-----------|-----------|-----------|
| 1.C   | -3.026734 | 13.207519 | -0.603826 |
| 2.C   | -3.185054 | 14.184579 | 0.382893  |
| 3.C   | -3.635488 | 15.458446 | 0.017627  |
| 4.C   | -3.924561 | 15.751735 | -1.319673 |
| 5.C   | -3.761285 | 14.762978 | -2.296213 |
| 6.C   | -3.311435 | 13.485329 | -1.943614 |
| 7.H   | -2.959666 | 13.953338 | 1.419991  |
| 8.H   | -3.759506 | 16.220870 | 0.783887  |
| 9.H   | -4.274218 | 16.742836 | -1.598556 |
| 10.H  | -3.983492 | 14.981847 | -3.338579 |
| 11.H  | -3.183178 | 12.715443 | -2.699028 |
| 12.Br | -2.400426 | 11.440722 | -0.106299 |
| 13.H  | -1.872002 | 7.497867  | -5.714886 |
| 14.C  | -1.967576 | 8.114464  | -4.824037 |



|      |           |           |           |
|------|-----------|-----------|-----------|
| 15.C | -2.176771 | 9.492234  | -4.929241 |
| 16.C | -2.293347 | 10.243125 | -3.754883 |
| 17.N | -2.214210 | 9.705644  | -2.525306 |
| 18.C | -2.012852 | 8.379644  | -2.434775 |
| 19.C | -1.883754 | 7.545552  | -3.550306 |
| 20.H | -2.248754 | 9.979090  | -5.899042 |
| 21.H | -2.456932 | 11.319950 | -3.796511 |
| 22.H | -1.953065 | 7.972481  | -1.425482 |
| 23.H | -1.721790 | 6.478174  | -3.419273 |

**$\theta = 100^\circ$**

(8.97 kcal mol<sup>-1</sup>)

|       |           |           |           |
|-------|-----------|-----------|-----------|
| 1.C   | -3.026734 | 13.207519 | -0.603826 |
| 2.C   | -3.185054 | 14.184579 | 0.382893  |
| 3.C   | -3.635488 | 15.458446 | 0.017627  |
| 4.C   | -3.924561 | 15.751735 | -1.319673 |
| 5.C   | -3.761285 | 14.762978 | -2.296213 |
| 6.C   | -3.311435 | 13.485329 | -1.943614 |
| 7.H   | -2.959666 | 13.953338 | 1.419991  |
| 8.H   | -3.759506 | 16.220870 | 0.783887  |
| 9.H   | -4.274218 | 16.742836 | -1.598556 |
| 10.H  | -3.983492 | 14.981847 | -3.338579 |
| 11.H  | -3.183178 | 12.715443 | -2.699028 |
| 12.Br | -2.400426 | 11.440722 | -0.106299 |
| 13.H  | -2.261887 | 8.465875  | -6.304096 |
| 14.C  | -2.295788 | 8.929084  | -5.320618 |
| 15.C  | -2.470612 | 10.309262 | -5.187861 |
| 16.C  | -2.507667 | 10.858620 | -3.902023 |
| 17.N  | -2.383283 | 10.124462 | -2.782851 |
| 18.C  | -2.215536 | 8.797908  | -2.921182 |

|      |           |           |           |
|------|-----------|-----------|-----------|
| 19.C | -2.165442 | 8.156563  | -4.163338 |
| 20.H | -2.576475 | 10.950562 | -6.059785 |
| 21.H | -2.642385 | 11.930642 | -3.758268 |
| 22.H | -2.117630 | 8.228935  | -1.996676 |
| 23.H | -2.027663 | 7.079162  | -4.217389 |

$\theta = 90^\circ$

(33.75 kcal mol<sup>-1</sup>)

|       |           |           |           |
|-------|-----------|-----------|-----------|
| 1.C   | -3.026734 | 13.207519 | -0.603826 |
| 2.C   | -3.185054 | 14.184579 | 0.382893  |
| 3.C   | -3.635488 | 15.458446 | 0.017627  |
| 4.C   | -3.924561 | 15.751735 | -1.319673 |
| 5.C   | -3.761285 | 14.762978 | -2.296213 |
| 6.C   | -3.311435 | 13.485329 | -1.943614 |
| 7.H   | -2.959666 | 13.953338 | 1.419991  |
| 8.H   | -3.759506 | 16.220870 | 0.783887  |
| 9.H   | -4.274218 | 16.742836 | -1.598556 |
| 10.H  | -3.983492 | 14.981847 | -3.338579 |
| 11.H  | -3.183178 | 12.715443 | -2.699028 |
| 12.Br | -2.400426 | 11.440722 | -0.106299 |
| 13.H  | -2.652655 | 9.525313  | -6.705479 |
| 14.C  | -2.624782 | 9.820769  | -5.659120 |
| 15.C  | -2.753477 | 11.163437 | -5.293386 |
| 16.C  | -2.711379 | 11.494102 | -3.934918 |
| 17.N  | -2.552868 | 10.583276 | -2.959072 |
| 18.C  | -2.429985 | 9.294549  | -3.321153 |
| 19.C  | -2.459531 | 8.865715  | -4.652323 |
| 20.H  | -2.883939 | 11.941593 | -6.041835 |
| 21.H  | -2.808264 | 12.530273 | -3.610867 |
| 22.H  | -2.302814 | 8.579215  | -2.508656 |

23.H -2.355315 7.809402 -4.889049
